# Supplementary material for: Dual-functional injectable hydrogels as antimicrobial and angiogenic therapeutics for dental pulp regeneration
Source: Royal Society of Chemistry journal article supplement (doi:10.1039/d5tb00559k), 2025-01-01
Supplement: d5tb00559k1.xlsx [file d5tb00559k1.xlsx]

## Sheet: Swelling ratio
			HACM1
	N	3		1st		2nd		3rd
	Mean	SD	Time (min)	m (g)	SR (%)	m (g)	SR (%)	m (g)	SR (%)
	0	0	0	0.2301	0	0.2212	0	0.3119	0
	100.333	5.49036	5	0.4432	92.6119	0.4501	103.481	0.6391	104.905
	129.767	7.04854	10	0.511	122.077	0.5289	139.105	0.7115	128.118
	158.711	8.95774	15	0.5911	156.888	0.5983	170.479	0.7759	148.766
	253.468	15.4257	20	0.8232	257.757	0.8181	269.846	1.038	232.799
	312.66	46.2871	25	0.9435	310.039	1.041	370.615	1.1145	257.326
			HACM2
	N	3		1st		2nd		3rd
	Mean	SD	Time (min)	m (g)	SR (%)	m (g)	SR (%)	m (g)	SR (%)
	0	0	0	0.2502	0	0.2653	0	0.2786	0
	65.4977	5.01602	5	0.431	72.2622	0.435	63.9653	0.4465	60.2656
	84.7481	5.42451	10	0.4797	91.7266	0.4882	84.0181	0.4973	78.4996
	94.0747	4.45168	15	0.4999	99.8002	0.5133	93.4791	0.5264	88.9447
	122.203	4.06996	20	0.5687	127.298	0.5889	121.975	0.6055	117.337
	127.277	4.56867	25	0.5798	131.735	0.6078	129.099	0.6157	120.998
			HACM3
	N	3		1st		2nd		3rd
	Mean	SD	Time (min)	m (g)	SR (%)	m (g)	SR (%)	m (g)	SR (%)
	0	0	0	0.3289	0	0.3042	0	0.2927	0
	73.7915	5.29757	5	0.5663	72.18	0.5504	80.9336	0.4925	68.261
	108.017	1.86327	10	0.6777	106.05	0.6404	110.519	0.6073	107.482
	133.636	1.61058	15	0.7661	132.928	0.7175	135.865	0.6794	132.115
	159.092	10.9847	20	0.8038	144.39	0.7973	162.097	0.7926	170.789
	182.064	9.8134	25	0.8882	170.052	0.858	182.051	0.8608	194.09
			HACM4
	N	3		1st		2nd		3rd
	Mean	SD	Time (min)	m (g)	SR (%)	m (g)	SR (%)	m (g)	SR (%)
	0	0	0	0.1692	0	0.1557	0	0.1392	0
	130.795	13.4398	5	0.362	113.948	0.3606	131.599	0.3436	146.839
	168.276	8.58317	10	0.4399	159.988	0.4122	164.74	0.3899	180.101
	206.507	18.3283	15	0.4851	186.702	0.4701	201.927	0.4606	230.891
	211.44	13.8361	20	0.4992	195.035	0.4833	210.405	0.4578	228.879
	247.45	22.9638	25	0.5522	226.359	0.5241	236.609	0.5281	279.382

## Sheet: Crosslinking density
		HACM1	HACM2	HACM3	HACM4				HACM1	HACM2	HACM3	HACM4
	φs	18	18	18	18	mL/mol			310.039	99.8002	132.928	186.702
	ps	1.005	1.005	1.005	1.005	g/mL			370.615	93.4791	135.865	201.927
	pp	1.7	1.7	1.7	1.7	g/mL			257.326	88.9447	132.115	230.891
	φp	0.00190315	0.00588872	0.00442765	0.00315642
		0.00159258	0.00628441	0.00433237	0.00291913
		0.00229212	0.00660268	0.00445478	0.00255388
	X	0.473	0.473	0.473	0.473
	v	22.6099	157.101	95.7416	53.5046	nmol/mL
		16.7238	176.02	92.2105	46.8113
		31.0018	191.941	96.7577	37.2659
	Mean	23.4 ± 5.9	175 ± 14.2	94.9 ± 1.9	45.9 ± 6.7

## Sheet: Gelation time
	HA variation							CMC variation							BDDE variation
	73	30	25	14	6			26	5.5	4.5	3	2.5			250	175	125	70	3
	66	27	23	13	5			31	7	5	4	3			200	140	100	56	2
	67	29	24	14	5			29	6	5	3	3			203	142	124	67	2
Mean	68.7 ± 3.1	28.7 ± 1.2	24 ± 0.8	13.7 ± 0.5	5.3 ± 0.5		Mean	28.7 ± 2.1	6.2 ± 0.6	4.8 ± 0.2	3.3 ± 0.5	2.8 ± 0.2		Mean	217.7 ± 22.9	152.3 ± 16	116.3 ± 11.6	64.3 ± 6	2.3 ± 0.5
HA	0	2.4	2.7	3	3.2		HA	3.2	3.2	3.2	3.2	3.2		HA	3.2	3.2	3.2	3.2	3.2
CMC	0.9	0.9	0.9	0.9	0.9		CMC	0	0.9	1.4	1.8	2.3		CMC	2.3	2.3	2.3	2.3	2.3
BDDE	12	12	12	12	12		BDDE	12	12	12	12	12		BDDE	5.1	6.9	8.5	10	12

## Sheet: Size distribution
		Diameter (nm)	Frequency (%)
		30	0	0
		40	3	1.2
		50	10	5
		60	21	12.6
		70	37	25.9
		80	18	14.4
		90	7	6.3
		100	4	4
		110	2	2.2
		120	0	0
			Mean	71.6 ± 7.8

## Sheet: FTIR
		Non-BDDE	Mod-BDDE	BDDE
	600	43.1	6	34
	601	43.5	6.1	34.1
	602	43.7	5.9	33.9
	603	43.8	6	34
	604	43.9	6.4	34.4
	605	43.7	6.7	34.7
	606	43.9	7.2	35.2
	607	44.1	7.6	35.6
	607	44.1	7.7	35.7
	608	44.2	7.7	35.7
	609	44.6	8	36
	610	45.1	8.3	36.3
	611	45.4	8.4	36.4
	612	45.5	8.5	36.5
	613	45.7	8.8	36.8
	614	46.1	8.9	36.9
	615	46.3	8.9	36.9
	616	46.5	8.9	36.9
	617	46.9	9.2	37.2
	618	47.5	9.7	37.7
	619	47.7	9.9	37.9
	620	47.8	10.1	38.1
	621	47.8	10.4	38.4
	622	47.8	10.8	38.8
	623	47.7	10.9	38.9
	624	47.6	11	39
	625	47.8	11.3	39.3
	626	48	11.6	39.6
	627	48.1	11.8	39.8
	628	48.2	11.9	39.9
	629	48.3	12.1	40.1
	630	48.4	12.3	40.3
	631	48.5	12.3	40.3
	632	48.7	12.3	40.3
	633	49	12.3	40.3
	634	49.2	12.3	40.3
	634	49.4	12.3	40.3
	635	49.4	12.3	40.3
	636	49.6	12.4	40.4
	637	49.9	12.6	40.6
	638	50	12.7	40.7
	639	50.2	12.8	40.8
	640	50.4	13	41
	641	50.5	13.1	41.1
	642	50.5	13.1	41.1
	643	50.4	13.1	41.1
	644	50.4	13.1	41.1
	645	50.4	13.1	41.1
	646	50.3	13.1	41.1
	647	50.4	13.1	41.1
	648	50.6	13.3	41.3
	649	50.8	13.4	41.4
	650	51	13.4	41.4
	651	51.1	13.5	41.5
	652	51.1	13.6	41.6
	653	51.1	13.6	41.6
	654	51	13.6	41.6
	655	51	13.6	41.6
	656	51	13.6	41.6
	657	51.1	13.7	41.7
	658	51	13.6	41.6
	659	51	13.6	41.6
	660	50.9	13.7	41.7
	661	51	13.7	41.7
	661	50.9	13.8	41.8
	662	50.9	13.9	41.9
	663	51	14.1	42.1
	664	51	14.3	42.3
	665	51.1	14.4	42.4
	666	51.1	14.5	42.5
	667	51.2	14.6	42.6
	668	51.3	14.7	42.7
	669	51.3	14.7	42.7
	670	51.3	14.7	42.7
	671	51.3	14.8	42.8
	672	51.3	14.9	42.9
	673	51.4	15	43
	674	51.5	15.1	43.1
	675	51.7	15.2	43.2
	676	51.8	15.3	43.3
	677	51.8	15.3	43.3
	678	51.8	15.3	43.3
	679	51.8	15.4	43.4
	680	51.9	15.4	43.4
	681	52	15.5	43.5
	682	52	15.6	43.6
	683	52.2	15.7	43.7
	684	52.2	15.8	43.8
	685	52.3	15.8	43.8
	686	52.4	15.8	43.8
	687	52.4	15.9	43.9
	688	52.5	16	44
	688	52.4	16	44
	689	52.4	16	44
	690	52.3	16.1	44.1
	691	52.3	16.2	44.2
	692	52.3	16.2	44.2
	693	52.2	16.2	44.2
	694	52.3	16.3	44.3
	695	52.3	16.4	44.4
	696	52.4	16.4	44.4
	697	52.4	16.5	44.5
	698	52.5	16.6	44.6
	699	52.5	16.7	44.7
	700	52.6	16.7	44.7
	701	52.7	16.8	44.8
	702	52.8	16.9	44.9
	703	53	17	45
	704	53.1	17.2	45.2
	705	53.3	17.3	45.3
	706	53.5	17.5	45.5
	707	53.6	17.7	45.7
	708	53.8	17.8	45.8
	709	54	18	46
	710	54.1	18.1	46.1
	711	54.3	18.2	46.2
	712	54.5	18.3	46.3
	713	54.6	18.3	46.3
	714	54.8	18.4	46.4
	715	54.9	18.6	46.6
	715	55	18.7	46.7
	716	55.2	18.8	46.8
	717	55.3	19	47
	718	55.4	19.1	47.1
	719	55.6	19.3	47.3
	720	55.7	19.4	47.4
	721	55.8	19.6	47.6
	722	55.9	19.8	47.8
	723	56	19.9	47.9
	724	56.1	20.1	48.1
	725	56.1	20.3	48.3
	726	56.2	20.5	48.5
	727	56.2	20.6	48.6
	728	56.2	20.8	48.8
	729	56.2	20.9	48.9
	730	56.1	21.1	49.1
	731	56.1	21.3	49.3
	732	56	21.5	49.5
	733	55.9	21.6	49.6
	734	55.9	21.8	49.8
	735	55.8	21.9	49.9
	736	55.8	22	50
	737	55.8	22.1	50.1
	738	55.8	22.3	50.3
	739	55.8	22.4	50.4
	740	55.8	22.6	50.6
	741	55.8	22.8	50.8
	742	55.9	23	51
	742	56	23.1	51.1
	743	56	23.3	51.3
	744	56.1	23.4	51.4
	745	56.2	23.6	51.6
	746	56.3	23.7	51.7
	747	56.4	23.8	51.8
	748	56.6	24	52
	749	56.7	24.2	52.2
	750	56.9	24.4	52.4
	751	57.1	24.6	52.6
	752	57.2	24.8	52.8
	753	57.4	25	53
	754	57.5	25.2	53.2
	755	57.7	25.4	53.4
	756	57.9	25.6	53.6
	757	58.2	25.8	53.8
	758	58.5	26	54
	759	58.8	26.2	54.2
	760	59.2	26.5	54.5
	761	59.6	26.7	54.7
	762	60	27	55
	763	60.4	27.2	55.2
	764	60.8	27.4	55.4
	765	61.3	27.6	55.6
	766	61.7	27.8	55.8
	767	62.1	27.9	55.9
	768	62.6	28.1	56.1
	769	63	28.3	56.3
	769	63.4	28.5	56.5
	770	63.8	28.7	56.7
	771	64.2	28.8	56.8
	772	64.5	29	57
	773	64.7	29.1	57.1
	774	64.9	29.2	57.2
	775	65.1	29.3	57.3
	776	65.3	29.5	57.5
	777	65.5	29.7	57.7
	778	65.6	29.8	57.8
	779	65.8	29.9	57.9
	780	65.9	30	58
	781	66	30.1	58.1
	782	66.1	30.2	58.2
	783	66.1	30.3	58.3
	784	66.2	30.4	58.4
	785	66.2	30.4	58.4
	786	66.2	30.5	58.5
	787	66.2	30.6	58.6
	788	66.2	30.7	58.7
	789	66.2	30.7	58.7
	790	66.2	30.8	58.8
	791	66.2	30.9	58.9
	792	66.3	31	59
	793	66.4	31.1	59.1
	794	66.4	31.3	59.3
	795	66.5	31.4	59.4
	796	66.6	31.6	59.6
	796	66.7	31.7	59.7
	797	66.8	31.9	59.9
	798	66.9	32.1	60.1
	799	67	32.3	60.3
	800	67.2	32.4	60.4
	801	67.3	32.6	60.6
	802	67.5	32.8	60.8
	803	67.7	33	61
	804	67.8	33.1	61.1
	805	67.9	33.3	61.3
	806	68.1	33.5	61.5
	807	68.2	33.7	61.7
	808	68.4	33.8	61.8
	809	68.5	34	62
	810	68.6	34.2	62.2
	811	68.8	34.4	62.4
	812	68.9	34.6	62.6
	813	68.9	34.8	62.8
	814	69	35	63
	815	69.1	35.3	63.3
	816	69.1	35.4	63.4
	817	69.1	35.6	63.6
	818	69.2	35.8	63.8
	819	69.2	36	64
	820	69.2	36.1	64.1
	821	69.2	36.3	64.3
	822	69.1	36.5	64.5
	823	69.1	36.7	64.7
	823	69	36.9	64.9
	824	68.9	37	65
	825	68.8	37.2	65.2
	826	68.6	37.3	65.3
	827	68.4	37.5	65.5
	828	68.1	37.6	65.6
	829	67.9	37.7	65.7
	830	67.6	37.8	65.8
	831	67.4	37.9	65.9
	832	67.2	38	66
	833	67.1	38.2	66.2
	834	66.9	38.4	66.4
	835	66.8	38.5	66.5
	836	66.7	38.7	66.7
	837	66.6	38.8	66.8
	838	66.6	38.9	66.9
	839	66.7	39	67
	840	66.7	39.1	67.1
	841	66.9	39.2	67.2
	842	67	39.4	67.4
	843	67.1	39.5	67.5
	844	67.2	39.6	67.6
	845	67.4	39.7	67.7
	846	67.5	39.8	67.8
	847	67.6	39.9	67.9
	848	67.7	40	68
	849	67.7	40.1	68.1
	850	67.8	40.2	68.2
	850	67.9	40.3	68.3
	851	68	40.4	68.4
	852	68.1	40.5	68.5
	853	68.2	40.6	68.6
	854	68.2	40.6	68.6
	855	68.3	40.7	68.7
	856	68.5	40.8	68.8
	857	68.7	40.9	68.9
	858	69	40.9	68.9
	859	69.4	41	69
	860	69.9	41.1	69.1
	861	70.4	41.1	69.1
	862	71	41.2	69.2
	863	71.5	41.3	69.3
	864	72	41.4	69.4
	865	72.5	41.4	69.4
	866	73	41.5	69.5
	867	73.4	41.5	69.5
	868	73.8	41.6	69.6
	869	74.1	41.6	69.6
	870	74.4	41.6	69.6
	871	74.6	41.5	69.5
	872	74.7	41.5	69.5
	873	74.8	41.5	69.5
	874	74.9	41.4	69.4
	875	74.9	41.4	69.4
	876	74.9	41.4	69.4
	877	74.9	41.4	69.4
	877	74.9	41.3	69.3
	878	74.8	41.3	69.3
	879	74.7	41.2	69.2
	880	74.6	41.2	69.2
	881	74.5	41.1	69.1
	882	74.3	41	69
	883	74.2	40.9	68.9
	884	74	40.7	68.7
	885	73.8	40.5	68.5
	886	73.6	40.3	68.3
	887	73.4	40.1	68.1
	888	73.2	39.9	67.9
	889	72.9	39.7	67.7
	890	72.7	39.6	67.6
	891	72.5	39.4	67.4
	892	72.2	39.3	67.3
	893	72	39.3	67.3
	894	71.8	39.2	67.2
	895	71.6	39.2	67.2
	896	71.4	39.2	67.2
	897	71.2	39.3	67.3
	898	71.1	39.4	67.4
	899	70.9	39.5	67.5
	900	70.7	39.6	67.6
	901	70.6	39.7	67.7
	902	70.4	39.9	67.9
	903	70.2	40	68
	904	70	40.1	68.1
	904	69.9	40.2	68.2
	905	69.7	40.4	68.4
	906	69.6	40.5	68.5
	907	69.5	40.5	68.5
	908	69.4	40.6	68.6
	909	69.4	40.6	68.6
	910	69.3	40.6	68.6
	911	69.4	40.6	68.6
	912	69.5	40.6	68.6
	913	69.6	40.6	68.6
	914	69.8	40.6	68.6
	915	70.1	40.5	68.5
	916	70.3	40.4	68.4
	917	70.6	40.4	68.4
	918	71	40.3	68.3
	919	71.3	40.3	68.3
	920	71.6	40.2	68.2
	921	71.9	40.2	68.2
	922	72.1	40.1	68.1
	923	72.2	40	68
	924	72.3	39.9	67.9
	925	72.3	39.8	67.8
	926	72.2	39.7	67.7
	927	72.1	39.5	67.5
	928	72	39.3	67.3
	929	71.9	39.1	67.1
	930	71.7	38.9	66.9
	931	71.5	38.6	66.6
	931	71.2	38.4	66.4
	932	71	38.1	66.1
	933	70.7	37.8	65.8
	934	70.4	37.5	65.5
	935	70.2	37.2	65.2
	936	69.9	36.8	64.8
	937	69.6	36.5	64.5
	938	69.3	36.2	64.2
	939	68.9	35.9	63.9
	940	68.6	35.6	63.6
	941	68.3	35.3	63.3
	942	68.1	35.1	63.1
	943	67.9	34.9	62.9
	944	67.7	34.8	62.8
	945	67.6	34.7	62.7
	946	67.5	34.7	62.7
	947	67.6	34.8	62.8
	948	67.6	34.9	62.9
	949	67.8	35.1	63.1
	950	68	35.4	63.4
	951	68.2	35.7	63.7
	952	68.4	36	64
	953	68.6	36.3	64.3
	954	68.8	36.5	64.5
	955	69	36.7	64.7
	956	69.1	36.9	64.9
	957	69.2	37	65
	957	69.2	37	65
	958	69.2	37	65
	959	69.1	36.9	64.9
	960	69	36.8	64.8
	961	68.8	36.6	64.6
	962	68.6	36.3	64.3
	963	68.4	36.1	64.1
	964	68.1	35.8	63.8
	965	67.8	35.4	63.4
	966	67.5	35.1	63.1
	967	67.1	34.6	62.6
	968	66.8	34.2	62.2
	969	66.4	33.7	61.7
	970	66	33.3	61.3
	971	65.7	32.8	60.8
	972	65.3	32.3	60.3
	973	64.9	31.7	59.7
	974	64.5	31.2	59.2
	975	64.1	30.6	58.6
	976	63.7	29.9	57.9
	977	63.2	29.2	57.2
	978	62.7	28.5	56.5
	979	62.2	27.8	55.8
	980	61.8	27.1	55.1
	981	61.3	26.3	54.3
	982	60.7	25.5	53.5
	983	60.2	24.8	52.8
	984	59.7	24	52
	984	59.1	23.3	51.3
	985	58.6	22.6	50.6
	986	58	21.8	49.8
	987	57.4	21.2	49.2
	988	56.9	20.5	48.5
	989	56.4	19.9	47.9
	990	55.9	19.4	47.4
	991	55.4	18.9	46.9
	992	55	18.5	46.5
	993	54.6	18.1	46.1
	994	54.2	17.8	45.8
	995	53.8	17.5	45.5
	996	53.5	17.3	45.3
	997	53.2	17	45
	998	52.8	16.8	44.8
	999	52.6	16.6	44.6
	1000	52.3	16.5	44.5
	1000	52	16.2	44.2
	1000	51.7	16	44
	1000	51.5	15.8	43.8
	1000	51.2	15.5	43.5
	1000	50.9	15.2	43.2
	1010	50.5	14.8	42.8
	1010	50.1	14.5	42.5
	1010	49.7	14.1	42.1
	1010	49.2	13.6	41.6
	1010	48.7	13.1	41.1
	1010	48.2	12.5	40.5
	1010	47.6	12	40
	1010	47	11.4	39.4
	1010	46.4	10.8	38.8
	1010	45.8	10.2	38.2
	1020	45.2	9.6	37.6
	1020	44.6	9	37
	1020	44	8.4	36.4
	1020	43.5	7.9	35.9
	1020	43	7.5	35.5
	1020	42.5	7	35
	1020	42	6.7	34.7
	1020	41.6	6.4	34.4
	1020	41.3	6.1	34.1
	1020	41	6	34
	1020	40.7	5.8	33.8
	1030	40.5	5.7	33.7
	1030	40.3	5.6	33.6
	1030	40.2	5.6	33.6
	1030	40	5.6	33.6
	1030	39.9	5.6	33.6
	1030	39.8	5.7	33.7
	1030	39.7	5.8	33.8
	1030	39.7	5.9	33.9
	1030	39.7	6	34
	1030	39.6	6.1	34.1
	1040	39.6	6.3	34.3
	1040	39.6	6.4	34.4
	1040	39.6	6.6	34.6
	1040	39.7	6.8	34.8
	1040	39.7	7	35
	1040	39.8	7.2	35.2
	1040	39.8	7.4	35.4
	1040	40	7.6	35.6
	1040	40.1	7.8	35.8
	1040	40.2	8.1	36.1
	1050	40.4	8.4	36.4
	1050	40.6	8.6	36.6
	1050	40.8	8.9	36.9
	1050	41	9.3	37.3
	1050	41.3	9.6	37.6
	1050	41.6	10	38
	1050	41.9	10.4	38.4
	1050	42.2	10.8	38.8
	1050	42.5	11.2	39.2
	1050	42.8	11.7	39.7
	1050	43.1	12.1	40.1
	1060	43.4	12.5	40.5
	1060	43.6	12.9	40.9
	1060	43.9	13.3	41.3
	1060	44.1	13.6	41.6
	1060	44.3	13.9	41.9
	1060	44.4	14.3	42.3
	1060	44.6	14.6	42.6
	1060	44.7	14.8	42.8
	1060	44.8	15.1	43.1
	1060	44.9	15.3	43.3
	1070	44.9	15.6	43.6
	1070	45	15.8	43.8
	1070	45	15.9	43.9
	1070	44.9	16.1	44.1
	1070	44.9	16.3	44.3
	1070	44.8	16.4	44.4
	1070	44.7	16.5	44.5
	1070	44.7	16.6	44.6
	1070	44.6	16.8	44.8
	1070	44.5	16.9	44.9
	1080	44.4	17	45
	1080	44.4	17.2	45.2
	1080	44.4	17.4	45.4
	1080	44.5	17.7	45.7
	1080	44.6	18	46
	1080	44.7	18.4	46.4
	1080	44.8	18.8	46.8
	1080	45	19.3	47.3
	1080	45.2	19.8	47.8
	1080	45.4	20.4	48.4
	1080	45.7	21	49
	1090	45.9	21.7	49.7
	1090	46.2	22.3	50.3
	1090	46.4	22.9	50.9
	1090	46.7	23.5	51.5
	1090	46.9	24	52
	1090	47.1	24.5	52.5
	1090	47.3	25	53
	1090	47.5	25.4	53.4
	1090	47.6	25.8	53.8
	1090	47.8	26.2	54.2
	1100	47.9	26.5	54.5
	1100	48.1	26.9	54.9
	1100	48.2	27.2	55.2
	1100	48.4	27.6	55.6
	1100	48.5	27.9	55.9
	1100	48.7	28.3	56.3
	1100	48.9	28.6	56.6
	1100	49.2	29	57
	1100	49.4	29.4	57.4
	1100	49.7	29.8	57.8
	1110	50	30.1	58.1
	1110	50.3	30.5	58.5
	1110	50.6	30.9	58.9
	1110	50.9	31.2	59.2
	1110	51.3	31.6	59.6
	1110	51.7	32	60
	1110	52.1	32.3	60.3
	1110	52.5	32.7	60.7
	1110	53	33.1	61.1
	1110	53.4	33.4	61.4
	1110	53.9	33.8	61.8
	1120	54.4	34.1	62.1
	1120	54.9	34.5	62.5
	1120	55.4	34.8	62.8
	1120	56	35.1	63.1
	1120	56.5	35.4	63.4
	1120	57	35.7	63.7
	1120	57.6	36	64
	1120	58.1	36.3	64.3
	1120	58.6	36.6	64.6
	1120	59.1	36.9	64.9
	1130	59.7	37.1	65.1
	1130	60.2	37.3	65.3
	1130	60.7	37.6	65.6
	1130	61.2	37.8	65.8
	1130	61.8	38	66
	1130	62.3	38.3	66.3
	1130	62.8	38.5	66.5
	1130	63.2	38.6	66.6
	1130	63.7	38.8	66.8
	1130	64.2	38.9	66.9
	1130	64.7	39	67
	1140	65.2	39.1	67.1
	1140	65.7	39.1	67.1
	1140	66.2	39.1	67.1
	1140	66.7	39	67
	1140	67.1	39	67
	1140	67.6	38.9	66.9
	1140	68	38.8	66.8
	1140	68.5	38.7	66.7
	1140	68.9	38.6	66.6
	1140	69.4	38.5	66.5
	1150	69.9	38.5	66.5
	1150	70.4	38.5	66.5
	1150	70.9	38.6	66.6
	1150	71.3	38.7	66.7
	1150	71.8	38.9	66.9
	1150	72.3	39.1	67.1
	1150	72.8	39.4	67.4
	1150	73.3	39.8	67.8
	1150	73.8	40.2	68.2
	1150	74.2	40.7	68.7
	1160	74.6	41.2	69.2
	1160	75	41.7	69.7
	1160	75.4	42.3	70.3
	1160	75.8	42.8	70.8
	1160	76.1	43.5	71.5
	1160	76.5	44.1	72.1
	1160	77	44.7	72.7
	1160	77.5	45.4	73.4
	1160	78	46	74
	1160	78.6	46.7	74.7
	1160	79.2	47.4	75.4
	1170	79.8	48	76
	1170	80.4	48.7	76.7
	1170	81.1	49.3	77.3
	1170	81.7	50	78
	1170	82.3	50.6	78.6
	1170	82.8	51.2	79.2
	1170	83.3	51.8	79.8
	1170	83.9	52.4	80.4
	1170	84.4	52.9	80.9
	1170	84.8	53.5	81.5
	1180	85.2	54	82
	1180	85.6	54.4	82.4
	1180	86	54.9	82.9
	1180	86.4	55.3	83.3
	1180	86.7	55.7	83.7
	1180	87	56.1	84.1
	1180	87.3	56.5	84.5
	1180	87.5	56.8	84.8
	1180	87.7	57	85
	1180	87.9	57.2	85.2
	1190	88	57.4	85.4
	1190	88.1	57.6	85.6
	1190	88.2	57.7	85.7
	1190	88.2	57.7	85.7
	1190	88.1	57.8	85.8
	1190	88.1	57.8	85.8
	1190	88	57.7	85.7
	1190	87.8	57.7	85.7
	1190	87.6	57.6	85.6
	1190	87.4	57.4	85.4
	1190	87.2	57.3	85.3
	1200	87	57.1	85.1
	1200	86.8	56.9	84.9
	1200	86.5	56.7	84.7
	1200	86.2	56.5	84.5
	1200	86	56.4	84.4
	1200	85.8	56.2	84.2
	1200	85.5	56.1	84.1
	1200	85.4	56	84
	1200	85.2	55.8	83.8
	1200	85.2	55.8	83.8
	1210	85.2	55.7	83.7
	1210	85.2	55.7	83.7
	1210	85.3	55.7	83.7
	1210	85.5	55.8	83.8
	1210	85.6	55.9	83.9
	1210	85.8	56	84
	1210	86	56.2	84.2
	1210	86.2	56.3	84.3
	1210	86.4	56.5	84.5
	1210	86.6	56.6	84.6
	1210	86.7	56.7	84.7
	1220	86.8	56.8	84.8
	1220	86.9	56.9	84.9
	1220	86.9	56.9	84.9
	1220	86.9	56.9	84.9
	1220	86.9	56.9	84.9
	1220	86.9	56.8	84.8
	1220	86.8	56.7	84.7
	1220	86.7	56.6	84.6
	1220	86.5	56.4	84.4
	1220	86.3	56.3	84.3
	1230	86.1	56.1	84.1
	1230	85.9	55.9	83.9
	1230	85.6	55.7	83.7
	1230	85.4	55.5	83.5
	1230	85.2	55.3	83.3
	1230	84.9	55.1	83.1
	1230	84.7	55	83
	1230	84.5	54.8	82.8
	1230	84.2	54.6	82.6
	1230	84	54.5	82.5
	1240	83.9	54.4	82.4
	1240	83.7	54.3	82.3
	1240	83.5	54.2	82.2
	1240	83.4	54.1	82.1
	1240	83.3	54.1	82.1
	1240	83.1	54	82
	1240	83	54	82
	1240	82.8	54	82
	1240	82.7	54	82
	1240	82.5	53.9	81.9
	1240	82.4	53.9	81.9
	1250	82.2	53.9	81.9
	1250	82	53.9	81.9
	1250	81.8	53.9	81.9
	1250	81.6	53.8	81.8
	1250	81.4	53.8	81.8
	1250	81.2	53.7	81.7
	1250	81	53.6	81.6
	1250	80.8	53.5	81.5
	1250	80.8	53.4	81.4
	1250	80.8	53.2	81.2
	1260	80.8	53.1	81.1
	1260	80.9	52.9	80.9
	1260	81	52.7	80.7
	1260	81.1	52.5	80.5
	1260	81.2	52.3	80.3
	1260	81.3	52.2	80.2
	1260	81.5	52.1	80.1
	1260	81.7	52	80
	1260	81.8	51.9	79.9
	1260	82	51.9	79.9
	1270	82.1	51.8	79.8
	1270	82.1	51.8	79.8
	1270	82.1	51.7	79.7
	1270	82	51.6	79.6
	1270	81.9	51.4	79.4
	1270	81.8	51.3	79.3
	1270	81.6	51.1	79.1
	1270	81.5	50.9	78.9
	1270	81.4	50.7	78.7
	1270	81.3	50.5	78.5
	1270	81.2	50.3	78.3
	1280	81.1	50.1	78.1
	1280	81	50	78
	1280	80.9	49.8	77.8
	1280	80.8	49.6	77.6
	1280	80.7	49.4	77.4
	1280	80.6	49.3	77.3
	1280	80.5	49.1	77.1
	1280	80.4	48.9	76.9
	1280	80.3	48.7	76.7
	1280	80.1	48.5	76.5
	1290	80	48.3	76.3
	1290	79.8	48	76
	1290	79.6	47.7	75.7
	1290	79.4	47.5	75.5
	1290	79.2	47.2	75.2
	1290	79	46.9	74.9
	1290	78.8	46.6	74.6
	1290	78.7	46.3	74.3
	1290	78.5	46	74
	1290	78.3	45.7	73.7
	1290	78.1	45.4	73.4
	1300	77.9	45.1	73.1
	1300	77.8	44.8	72.8
	1300	77.5	44.5	72.5
	1300	77.3	44.2	72.2
	1300	77.1	43.9	71.9
	1300	77	43.7	71.7
	1300	76.8	43.4	71.4
	1300	76.6	43.1	71.1
	1300	76.5	42.8	70.8
	1300	76.3	42.5	70.5
	1310	76.2	42.3	70.3
	1310	76.1	42.1	70.1
	1310	76	41.9	69.9
	1310	75.9	41.7	69.7
	1310	75.9	41.5	69.5
	1310	75.8	41.4	69.4
	1310	75.8	41.2	69.2
	1310	75.7	41.1	69.1
	1310	75.7	40.9	68.9
	1310	75.6	40.8	68.8
	1320	75.5	40.6	68.6
	1320	75.5	40.5	68.5
	1320	75.4	40.3	68.3
	1320	75.4	40.2	68.2
	1320	75.4	40.1	68.1
	1320	75.3	40	68
	1320	75.3	39.9	67.9
	1320	75.3	39.9	67.9
	1320	75.3	40	68
	1320	75.4	40.1	68.1
	1320	75.4	40.3	68.3
	1330	75.4	40.5	68.5
	1330	75.5	40.8	68.8
	1330	75.6	41.2	69.2
	1330	75.7	41.5	69.5
	1330	75.8	41.9	69.9
	1330	75.8	42.4	70.4
	1330	75.9	42.8	70.8
	1330	76	43.2	71.2
	1330	76	43.6	71.6
	1330	76.1	44	72
	1340	76.2	44.3	72.3
	1340	76.2	44.6	72.6
	1340	76.4	44.9	72.9
	1340	76.5	45.1	73.1
	1340	76.7	45.4	73.4
	1340	76.8	45.6	73.6
	1340	77	45.8	73.8
	1340	77.1	46	74
	1340	77.2	46.1	74.1
	1340	77.3	46.2	74.2
	1350	77.4	46.3	74.3
	1350	77.5	46.4	74.4
	1350	77.6	46.5	74.5
	1350	77.7	46.6	74.6
	1350	77.8	46.6	74.6
	1350	77.9	46.7	74.7
	1350	77.9	46.7	74.7
	1350	77.9	46.6	74.6
	1350	77.8	46.6	74.6
	1350	77.8	46.5	74.5
	1350	77.7	46.3	74.3
	1360	77.7	46.2	74.2
	1360	77.6	46	74
	1360	77.5	45.8	73.8
	1360	77.4	45.6	73.6
	1360	77.2	45.4	73.4
	1360	77.1	45.2	73.2
	1360	76.9	44.8	72.8
	1360	76.7	44.5	72.5
	1360	76.4	44.1	72.1
	1360	76.2	43.7	71.7
	1370	76	43.3	71.3
	1370	75.7	42.8	70.8
	1370	75.4	42.3	70.3
	1370	75.1	41.8	69.8
	1370	74.8	41.3	69.3
	1370	74.6	40.8	68.8
	1370	74.3	40.3	68.3
	1370	74.1	39.9	67.9
	1370	73.9	39.5	67.5
	1370	73.7	39.2	67.2
	1380	73.7	38.9	66.9
	1380	73.6	38.7	66.7
	1380	73.7	38.7	66.7
	1380	73.8	38.7	66.7
	1380	73.9	38.8	66.8
	1380	74.1	38.9	66.9
	1380	74.3	39.1	67.1
	1380	74.6	39.3	67.3
	1380	74.8	39.4	67.4
	1380	75	39.6	67.6
	1380	75.1	39.7	67.7
	1390	75.3	39.7	67.7
	1390	75.3	39.6	67.6
	1390	75.3	39.5	67.5
	1390	75.3	39.4	67.4
	1390	75.2	39.1	67.1
	1390	75.1	38.8	66.8
	1390	74.9	38.5	66.5
	1390	74.7	38.1	66.1
	1390	74.5	37.6	65.6
	1390	74.2	37.1	65.1
	1400	73.9	36.5	64.5
	1400	73.6	36	64
	1400	73.2	35.4	63.4
	1400	72.9	34.8	62.8
	1400	72.5	34.2	62.2
	1400	72.2	33.7	61.7
	1400	72	33.2	61.2
	1400	71.7	32.8	60.8
	1400	71.5	32.4	60.4
	1400	71.4	32.1	60.1
	1400	71.2	31.8	59.8
	1410	71.1	31.6	59.6
	1410	71.1	31.5	59.5
	1410	71.1	31.4	59.4
	1410	71.1	31.4	59.4
	1410	71.2	31.6	59.6
	1410	71.4	31.8	59.8
	1410	71.6	32.1	60.1
	1410	71.8	32.4	60.4
	1410	72.1	32.7	60.7
	1410	72.3	33.1	61.1
	1420	72.6	33.5	61.5
	1420	72.9	34	62
	1420	73.4	34.6	62.6
	1420	73.8	35.3	63.3
	1420	74.2	36	64
	1420	74.6	36.7	64.7
	1420	74.9	37.2	65.2
	1420	75.2	37.8	65.8
	1420	75.4	38.3	66.3
	1420	75.7	38.8	66.8
	1430	75.9	39.3	67.3
	1430	76.2	39.8	67.8
	1430	76.4	40.4	68.4
	1430	76.6	40.9	68.9
	1430	76.9	41.4	69.4
	1430	77.2	42	70
	1430	77.5	42.7	70.7
	1430	77.9	43.2	71.2
	1430	78.1	43.7	71.7
	1430	78.4	44.2	72.2
	1430	78.7	44.8	72.8
	1440	79.1	45.4	73.4
	1440	79.4	46	74
	1440	79.8	46.5	74.5
	1440	80.1	47	75
	1440	80.4	47.4	75.4
	1440	80.5	47.7	75.7
	1440	80.7	48	76
	1440	80.9	48.3	76.3
	1440	81	48.5	76.5
	1440	81.1	48.8	76.8
	1450	81.2	49	77
	1450	81.3	49.2	77.2
	1450	81.4	49.4	77.4
	1450	81.6	49.6	77.6
	1450	81.7	49.8	77.8
	1450	81.9	49.9	77.9
	1450	82	50.1	78.1
	1450	82.1	50.2	78.2
	1450	82.2	50.3	78.3
	1450	82.4	50.5	78.5
	1460	82.6	50.7	78.7
	1460	82.9	50.9	78.9
	1460	83.2	51.2	79.2
	1460	83.5	51.4	79.4
	1460	83.7	51.6	79.6
	1460	83.9	51.7	79.7
	1460	84	51.7	79.7
	1460	84.1	51.8	79.8
	1460	84.3	51.8	79.8
	1460	84.5	51.9	79.9
	1460	84.7	52	80
	1470	84.9	52.1	80.1
	1470	85	52.2	80.2
	1470	85.1	52.3	80.3
	1470	85.2	52.3	80.3
	1470	85.4	52.4	80.4
	1470	85.5	52.5	80.5
	1470	85.6	52.6	80.6
	1470	85.7	52.8	80.8
	1470	85.8	53	81
	1470	85.9	53.2	81.2
	1480	85.9	53.4	81.4
	1480	86	53.6	81.6
	1480	86	53.8	81.8
	1480	86	54	82
	1480	86.1	54.1	82.1
	1480	86.1	54.3	82.3
	1480	86.3	54.6	82.6
	1480	86.4	54.7	82.7
	1480	86.6	54.9	82.9
	1480	86.8	55	83
	1480	87	55.1	83.1
	1490	87.3	55.2	83.2
	1490	87.5	55.2	83.2
	1490	87.9	55.3	83.3
	1490	88.2	55.4	83.4
	1490	88.6	55.4	83.4
	1490	88.9	55.4	83.4
	1490	89.1	55.4	83.4
	1490	89.3	55.4	83.4
	1490	89.4	55.4	83.4
	1490	89.4	55.3	83.3
	1500	89.5	55.3	83.3
	1500	89.6	55.3	83.3
	1500	89.7	55.2	83.2
	1500	89.7	55.1	83.1
	1500	89.7	55	83
	1500	89.7	55	83
	1500	89.7	54.9	82.9
	1500	89.7	54.7	82.7
	1500	89.7	54.6	82.6
	1500	89.8	54.6	82.6
	1510	89.7	54.5	82.5
	1510	89.6	54.3	82.3
	1510	89.5	54.1	82.1
	1510	89.4	53.9	81.9
	1510	89.2	53.6	81.6
	1510	89.1	53.3	81.3
	1510	89	53.1	81.1
	1510	89	53	81
	1510	88.9	52.8	80.8
	1510	88.8	52.6	80.6
	1510	88.7	52.3	80.3
	1520	88.6	52.1	80.1
	1520	88.4	51.8	79.8
	1520	88.3	51.4	79.4
	1520	88.1	51.1	79.1
	1520	87.8	50.8	78.8
	1520	87.6	50.5	78.5
	1520	87.3	50	78
	1520	87	49.6	77.6
	1520	86.8	49.2	77.2
	1520	86.6	48.8	76.8
	1530	86.4	48.3	76.3
	1530	86.2	47.8	75.8
	1530	85.9	47.3	75.3
	1530	85.7	46.8	74.8
	1530	85.4	46.3	74.3
	1530	85.2	45.8	73.8
	1530	85	45.3	73.3
	1530	84.6	44.7	72.7
	1530	84.3	43.9	71.9
	1530	83.9	43.2	71.2
	1540	83.7	42.6	70.6
	1540	83.4	42	70
	1540	83.2	41.5	69.5
	1540	83	40.9	68.9
	1540	82.7	40.2	68.2
	1540	82.2	39.4	67.4
	1540	81.7	38.6	66.6
	1540	81.2	37.9	65.9
	1540	80.6	37.4	65.4
	1540	80.1	37	65
	1540	79.6	36.6	64.6
	1550	79.1	36.2	64.2
	1550	78.8	35.8	63.8
	1550	78.4	35.4	63.4
	1550	78	35	63
	1550	77.5	34.5	62.5
	1550	77.1	34.1	62.1
	1550	76.7	33.6	61.6
	1550	76.3	33.1	61.1
	1550	75.9	32.6	60.6
	1550	75.6	32.2	60.2
	1560	75.3	31.9	59.9
	1560	75	31.5	59.5
	1560	74.6	31	59
	1560	74.2	30.5	58.5
	1560	73.8	30	58
	1560	73.4	29.4	57.4
	1560	73.1	28.9	56.9
	1560	72.8	28.6	56.6
	1560	72.6	28.3	56.3
	1560	72.4	28	56
	1560	72.2	27.6	55.6
	1570	71.9	27.2	55.2
	1570	71.7	26.9	54.9
	1570	71.5	26.4	54.4
	1570	71.2	26	54
	1570	71	25.6	53.6
	1570	70.7	25.2	53.2
	1570	70.4	24.8	52.8
	1570	70.2	24.5	52.5
	1570	70.1	24.3	52.3
	1570	69.8	24	52
	1580	69.6	23.7	51.7
	1580	69.3	23.5	51.5
	1580	69	23.3	51.3
	1580	68.7	23.1	51.1
	1580	68.4	23	51
	1580	68.1	22.9	50.9
	1580	67.9	22.8	50.8
	1580	67.6	22.7	50.7
	1580	67.3	22.7	50.7
	1580	67	22.7	50.7
	1590	66.8	22.7	50.7
	1590	66.5	22.6	50.6
	1590	66.2	22.6	50.6
	1590	66	22.7	50.7
	1590	65.8	22.7	50.7
	1590	65.6	22.8	50.8
	1590	65.5	22.8	50.8
	1590	65.3	22.9	50.9
	1590	65.2	23.1	51.1
	1590	65.1	23.2	51.2
	1590	65	23.4	51.4
	1600	65	23.6	51.6
	1600	64.9	23.8	51.8
	1600	64.9	24.1	52.1
	1600	64.9	24.3	52.3
	1600	64.9	24.6	52.6
	1600	65	24.9	52.9
	1600	65.1	25.3	53.3
	1600	65.3	25.7	53.7
	1600	65.4	26.1	54.1
	1600	65.6	26.5	54.5
	1610	65.8	26.9	54.9
	1610	66	27.3	55.3
	1610	66.2	27.8	55.8
	1610	66.5	28.3	56.3
	1610	66.8	28.8	56.8
	1610	67.1	29.3	57.3
	1610	67.4	29.8	57.8
	1610	67.7	30.2	58.2
	1610	67.9	30.6	58.6
	1610	68.2	31	59
	1620	68.6	31.6	59.6
	1620	69	32.2	60.2
	1620	69.5	32.9	60.9
	1620	69.9	33.5	61.5
	1620	70.3	34	62
	1620	70.6	34.4	62.4
	1620	70.9	34.8	62.8
	1620	71.2	35.2	63.2
	1620	71.6	35.7	63.7
	1620	72	36.3	64.3
	1620	72.3	36.8	64.8
	1630	72.7	37.2	65.2
	1630	73	37.6	65.6
	1630	73.3	37.9	65.9
	1630	73.6	38.3	66.3
	1630	73.9	38.7	66.7
	1630	74.1	39	67
	1630	74.3	39.2	67.2
	1630	74.5	39.5	67.5
	1630	74.7	39.7	67.7
	1630	75	40.1	68.1
	1640	75.3	40.5	68.5
	1640	75.6	40.9	68.9
	1640	75.8	41.2	69.2
	1640	76.1	41.5	69.5
	1640	76.2	41.8	69.8
	1640	76.4	41.9	69.9
	1640	76.5	42.1	70.1
	1640	76.6	42.3	70.3
	1640	76.8	42.5	70.5
	1640	77	42.7	70.7
	1650	77.2	42.9	70.9
	1650	77.4	43.2	71.2
	1650	77.7	43.5	71.5
	1650	78	43.9	71.9
	1650	78.1	44.2	72.2
	1650	78.2	44.3	72.3
	1650	78.3	44.4	72.4
	1650	78.6	44.7	72.7
	1650	78.9	45.1	73.1
	1650	79.3	45.6	73.6
	1650	79.7	46.1	74.1
	1660	80.1	46.6	74.6
	1660	80.4	46.9	74.9
	1660	80.5	47.1	75.1
	1660	80.8	47.4	75.4
	1660	81	47.7	75.7
	1660	81.3	48.1	76.1
	1660	81.7	48.5	76.5
	1660	82.1	49	77
	1660	82.5	49.5	77.5
	1660	82.9	49.9	77.9
	1670	83.2	50.3	78.3
	1670	83.5	50.6	78.6
	1670	83.8	51	79
	1670	84.2	51.5	79.5
	1670	84.7	52	80
	1670	85.1	52.6	80.6
	1670	85.5	53.2	81.2
	1670	85.9	53.7	81.7
	1670	86.2	54.1	82.1
	1670	86.6	54.5	82.5
	1670	87	55	83
	1680	87.4	55.5	83.5
	1680	87.8	56	84
	1680	88.2	56.5	84.5
	1680	88.6	56.9	84.9
	1680	88.9	57.2	85.2
	1680	89.1	57.5	85.5
	1680	89.4	58	86
	1680	89.8	58.5	86.5
	1680	90.2	59.1	87.1
	1680	90.6	59.6	87.6
	1690	91.1	60.1	88.1
	1690	91.4	60.5	88.5
	1690	91.8	60.9	88.9
	1690	92	61.1	89.1
	1690	92.2	61.4	89.4
	1690	92.5	61.8	89.8
	1690	92.8	62.1	90.1
	1690	93	62.4	90.4
	1690	93.2	62.6	90.6
	1690	93.5	62.9	90.9
	1700	93.7	63.2	91.2
	1700	94	63.5	91.5
	1700	94.2	63.8	91.8
	1700	94.4	64.2	92.2
	1700	94.6	64.5	92.5
	1700	94.8	64.7	92.7
	1700	95	64.9	92.9
	1700	95.2	65.2	93.2
	1700	95.3	65.4	93.4
	1700	95.5	65.5	93.5
	1700	95.6	65.6	93.6
	1710	95.8	65.8	93.8
	1710	95.9	66	94
	1710	96.1	66.2	94.2
	1710	96.2	66.4	94.4
	1710	96.3	66.5	94.5
	1710	96.4	66.7	94.7
	1710	96.5	66.8	94.8
	1710	96.6	66.9	94.9
	1710	96.7	67.1	95.1
	1710	96.8	67.2	95.2
	1720	96.9	67.3	95.3
	1720	96.9	67.4	95.4
	1720	97	67.6	95.6
	1720	97.1	67.7	95.7
	1720	97.1	67.8	95.8
	1720	97.2	67.8	95.8
	1720	97.3	67.9	95.9
	1720	97.4	68	96
	1720	97.5	68.1	96.1
	1720	97.6	68.2	96.2
	1730	97.7	68.3	96.3
	1730	97.7	68.3	96.3
	1730	97.8	68.4	96.4
	1730	97.8	68.5	96.5
	1730	97.9	68.5	96.5
	1730	97.9	68.6	96.6
	1730	98	68.7	96.7
	1730	98	68.7	96.7
	1730	98	68.8	96.8
	1730	98	68.8	96.8
	1730	98.1	68.9	96.9
	1740	98.1	68.9	96.9
	1740	98.2	69	97
	1740	98.2	69.1	97.1
	1740	98.2	69.1	97.1
	1740	98.3	69.2	97.2
	1740	98.3	69.2	97.2
	1740	98.3	69.3	97.3
	1740	98.4	69.3	97.3
	1740	98.4	69.3	97.3
	1740	98.5	69.4	97.4
	1750	98.5	69.5	97.5
	1750	98.6	69.6	97.6
	1750	98.6	69.6	97.6
	1750	98.6	69.7	97.7
	1750	98.6	69.7	97.7
	1750	98.6	69.8	97.8
	1750	98.6	69.8	97.8
	1750	98.7	69.9	97.9
	1750	98.7	69.9	97.9
	1750	98.8	70	98
	1750	98.8	70	98
	1760	98.9	70.1	98.1
	1760	98.9	70.1	98.1
	1760	98.9	70.1	98.1
	1760	98.9	70.2	98.2
	1760	99	70.2	98.2
	1760	99	70.2	98.2
	1760	99	70.2	98.2
	1760	99	70.2	98.2
	1760	99	70.3	98.3
	1760	99	70.3	98.3
	1770	99.1	70.3	98.3
	1770	99.1	70.4	98.4
	1770	99.2	70.4	98.4
	1770	99.2	70.5	98.5
	1770	99.2	70.5	98.5
	1770	99.2	70.5	98.5
	1770	99.2	70.5	98.5
	1770	99.1	70.4	98.4
	1770	99.1	70.4	98.4
	1770	99	70.4	98.4
	1780	99.1	70.4	98.4
	1780	99.1	70.5	98.5
	1780	99.2	70.5	98.5
	1780	99.2	70.5	98.5
	1780	99.2	70.5	98.5
	1780	99.2	70.5	98.5
	1780	99.2	70.5	98.5
	1780	99.2	70.5	98.5
	1780	99.2	70.6	98.6
	1780	99.2	70.6	98.6
	1780	99.2	70.6	98.6
	1790	99.2	70.6	98.6
	1790	99.2	70.6	98.6
	1790	99.2	70.6	98.6
	1790	99.3	70.6	98.6
	1790	99.3	70.6	98.6
	1790	99.3	70.6	98.6
	1790	99.2	70.6	98.6
	1790	99.2	70.6	98.6
	1790	99.2	70.6	98.6
	1790	99.2	70.6	98.6
	1800	99.2	70.6	98.6
	1800	99.2	70.6	98.6
	1800	99.2	70.7	98.7
	1800	99.2	70.7	98.7
	1800	99.2	70.7	98.7
	1800	99.2	70.7	98.7
	1800	99.2	70.7	98.7
	1800	99.2	70.7	98.7
	1800	99.2	70.7	98.7
	1800	99.2	70.6	98.6
	1810	99.2	70.6	98.6
	1810	99.2	70.7	98.7
	1810	99.2	70.7	98.7
	1810	99.2	70.7	98.7
	1810	99.2	70.7	98.7
	1810	99.1	70.6	98.6
	1810	99.1	70.6	98.6
	1810	99.1	70.6	98.6
	1810	99	70.5	98.5
	1810	99	70.5	98.5
	1810	99	70.5	98.5
	1820	99	70.5	98.5
	1820	98.9	70.4	98.4
	1820	98.8	70.4	98.4
	1820	98.8	70.3	98.3
	1820	98.8	70.3	98.3
	1820	98.8	70.3	98.3
	1820	98.8	70.3	98.3
	1820	98.8	70.3	98.3
	1820	98.7	70.3	98.3
	1820	98.7	70.3	98.3
	1830	98.7	70.3	98.3
	1830	98.7	70.3	98.3
	1830	98.7	70.3	98.3
	1830	98.7	70.3	98.3
	1830	98.7	70.3	98.3
	1830	98.7	70.3	98.3
	1830	98.7	70.3	98.3
	1830	98.6	70.3	98.3
	1830	98.6	70.4	98.4
	1830	98.6	70.4	98.4
	1830	98.6	70.4	98.4
	1840	98.6	70.4	98.4
	1840	98.6	70.4	98.4
	1840	98.6	70.4	98.4
	1840	98.6	70.4	98.4
	1840	98.6	70.4	98.4
	1840	98.6	70.4	98.4
	1840	98.6	70.4	98.4
	1840	98.6	70.4	98.4
	1840	98.6	70.4	98.4
	1840	98.5	70.4	98.4
	1850	98.5	70.4	98.4
	1850	98.5	70.4	98.4
	1850	98.4	70.4	98.4
	1850	98.4	70.4	98.4
	1850	98.4	70.4	98.4
	1850	98.4	70.4	98.4
	1850	98.4	70.4	98.4
	1850	98.4	70.4	98.4
	1850	98.4	70.4	98.4
	1850	98.4	70.4	98.4
	1860	98.4	70.4	98.4
	1860	98.4	70.4	98.4
	1860	98.4	70.4	98.4
	1860	98.4	70.4	98.4
	1860	98.4	70.4	98.4
	1860	98.4	70.4	98.4
	1860	98.4	70.4	98.4
	1860	98.4	70.4	98.4
	1860	98.4	70.4	98.4
	1860	98.4	70.4	98.4
	1860	98.4	70.4	98.4
	1870	98.4	70.4	98.4
	1870	98.4	70.4	98.4
	1870	98.4	70.4	98.4
	1870	98.4	70.4	98.4
	1870	98.4	70.4	98.4
	1870	98.4	70.4	98.4
	1870	98.4	70.4	98.4
	1870	98.4	70.4	98.4
	1870	98.4	70.4	98.4
	1870	98.4	70.4	98.4
	1880	98.4	70.4	98.4
	1880	98.4	70.4	98.4
	1880	98.4	70.4	98.4
	1880	98.4	70.4	98.4
	1880	98.4	70.5	98.5
	1880	98.4	70.5	98.5
	1880	98.4	70.5	98.5
	1880	98.4	70.5	98.5
	1880	98.4	70.5	98.5
	1880	98.4	70.5	98.5
	1890	98.4	70.5	98.5
	1890	98.5	70.5	98.5
	1890	98.5	70.5	98.5
	1890	98.5	70.5	98.5
	1890	98.5	70.5	98.5
	1890	98.5	70.5	98.5
	1890	98.5	70.5	98.5
	1890	98.5	70.5	98.5
	1890	98.5	70.5	98.5
	1890	98.5	70.5	98.5
	1890	98.5	70.5	98.5
	1900	98.5	70.5	98.5
	1900	98.5	70.5	98.5
	1900	98.5	70.5	98.5
	1900	98.5	70.5	98.5
	1900	98.5	70.5	98.5
	1900	98.5	70.5	98.5
	1900	98.5	70.5	98.5
	1900	98.5	70.5	98.5
	1900	98.5	70.5	98.5
	1900	98.5	70.5	98.5
	1910	98.5	70.5	98.5
	1910	98.5	70.5	98.5
	1910	98.5	70.5	98.5
	1910	98.5	70.5	98.5
	1910	98.5	70.5	98.5
	1910	98.5	70.5	98.5
	1910	98.5	70.5	98.5
	1910	98.5	70.5	98.5
	1910	98.5	70.5	98.5
	1910	98.5	70.5	98.5
	1910	98.5	70.5	98.5
	1920	98.5	70.5	98.5
	1920	98.5	70.5	98.5
	1920	98.5	70.5	98.5
	1920	98.5	70.5	98.5
	1920	98.5	70.5	98.5
	1920	98.5	70.5	98.5
	1920	98.5	70.5	98.5
	1920	98.5	70.5	98.5
	1920	98.5	70.5	98.5
	1920	98.5	70.5	98.5
	1930	98.5	70.5	98.5
	1930	98.5	70.5	98.5
	1930	98.5	70.5	98.5
	1930	98.5	70.5	98.5
	1930	98.5	70.5	98.5
	1930	98.6	70.5	98.5
	1930	98.6	70.5	98.5
	1930	98.6	70.5	98.5
	1930	98.6	70.5	98.5
	1930	98.6	70.5	98.5
	1940	98.6	70.5	98.5
	1940	98.6	70.5	98.5
	1940	98.6	70.5	98.5
	1940	98.6	70.5	98.5
	1940	98.6	70.6	98.6
	1940	98.6	70.6	98.6
	1940	98.6	70.6	98.6
	1940	98.6	70.6	98.6
	1940	98.6	70.6	98.6
	1940	98.6	70.6	98.6
	1940	98.6	70.6	98.6
	1950	98.6	70.6	98.6
	1950	98.6	70.6	98.6
	1950	98.6	70.6	98.6
	1950	98.6	70.6	98.6
	1950	98.6	70.6	98.6
	1950	98.6	70.6	98.6
	1950	98.6	70.6	98.6
	1950	98.6	70.6	98.6
	1950	98.6	70.6	98.6
	1950	98.6	70.6	98.6
	1960	98.6	70.6	98.6
	1960	98.6	70.6	98.6
	1960	98.6	70.6	98.6
	1960	98.6	70.6	98.6
	1960	98.6	70.6	98.6
	1960	98.6	70.6	98.6
	1960	98.6	70.6	98.6
	1960	98.6	70.6	98.6
	1960	98.6	70.6	98.6
	1960	98.6	70.6	98.6
	1970	98.6	70.6	98.6
	1970	98.6	70.6	98.6
	1970	98.6	70.6	98.6
	1970	98.6	70.6	98.6
	1970	98.6	70.6	98.6
	1970	98.6	70.6	98.6
	1970	98.6	70.6	98.6
	1970	98.6	70.6	98.6
	1970	98.6	70.6	98.6
	1970	98.6	70.6	98.6
	1970	98.6	70.6	98.6
	1980	98.6	70.6	98.6
	1980	98.6	70.6	98.6
	1980	98.6	70.6	98.6
	1980	98.6	70.6	98.6
	1980	98.6	70.6	98.6
	1980	98.7	70.6	98.6
	1980	98.7	70.6	98.6
	1980	98.7	70.6	98.6
	1980	98.7	70.6	98.6
	1980	98.7	70.6	98.6
	1990	98.7	70.6	98.6
	1990	98.7	70.6	98.6
	1990	98.7	70.6	98.6
	1990	98.7	70.6	98.6
	1990	98.7	70.6	98.6
	1990	98.7	70.6	98.6
	1990	98.7	70.6	98.6
	1990	98.7	70.6	98.6
	1990	98.7	70.6	98.6
	1990	98.7	70.6	98.6
	2000	98.7	70.6	98.6
	2000	98.7	70.6	98.6
	2000	98.7	70.6	98.6
	2000	98.7	70.6	98.6
	2000	98.7	70.6	98.6
	2000	98.7	70.6	98.6
	2000	98.7	70.6	98.6
	2000	98.7	70.6	98.6
	2000	98.7	70.6	98.6
	2000	98.7	70.6	98.6
	2000	98.7	70.6	98.6
	2010	98.7	70.6	98.6
	2010	98.7	70.6	98.6
	2010	98.7	70.6	98.6
	2010	98.7	70.6	98.6
	2010	98.7	70.6	98.6
	2010	98.7	70.6	98.6
	2010	98.7	70.6	98.6
	2010	98.7	70.6	98.6
	2010	98.7	70.6	98.6
	2010	98.7	70.6	98.6
	2020	98.7	70.6	98.6
	2020	98.7	70.6	98.6
	2020	98.7	70.6	98.6
	2020	98.7	70.6	98.6
	2020	98.7	70.6	98.6
	2020	98.7	70.6	98.6
	2020	98.7	70.6	98.6
	2020	98.7	70.6	98.6
	2020	98.7	70.6	98.6
	2020	98.7	70.6	98.6
	2020	98.7	70.6	98.6
	2030	98.7	70.6	98.6
	2030	98.7	70.6	98.6
	2030	98.7	70.6	98.6
	2030	98.7	70.6	98.6
	2030	98.7	70.6	98.6
	2030	98.7	70.6	98.6
	2030	98.7	70.6	98.6
	2030	98.7	70.6	98.6
	2030	98.7	70.6	98.6
	2030	98.7	70.6	98.6
	2040	98.7	70.6	98.6
	2040	98.7	70.6	98.6
	2040	98.7	70.6	98.6
	2040	98.7	70.6	98.6
	2040	98.7	70.6	98.6
	2040	98.7	70.6	98.6
	2040	98.7	70.6	98.6
	2040	98.7	70.6	98.6
	2040	98.7	70.7	98.7
	2040	98.8	70.7	98.7
	2050	98.8	70.7	98.7
	2050	98.8	70.7	98.7
	2050	98.8	70.7	98.7
	2050	98.8	70.7	98.7
	2050	98.8	70.7	98.7
	2050	98.8	70.7	98.7
	2050	98.8	70.7	98.7
	2050	98.8	70.7	98.7
	2050	98.8	70.7	98.7
	2050	98.8	70.7	98.7
	2050	98.8	70.7	98.7
	2060	98.8	70.7	98.7
	2060	98.8	70.7	98.7
	2060	98.8	70.7	98.7
	2060	98.8	70.7	98.7
	2060	98.8	70.7	98.7
	2060	98.8	70.7	98.7
	2060	98.8	70.7	98.7
	2060	98.8	70.7	98.7
	2060	98.8	70.7	98.7
	2060	98.8	70.7	98.7
	2070	98.8	70.7	98.7
	2070	98.8	70.7	98.7
	2070	98.8	70.7	98.7
	2070	98.8	70.7	98.7
	2070	98.8	70.7	98.7
	2070	98.8	70.7	98.7
	2070	98.8	70.7	98.7
	2070	98.8	70.7	98.7
	2070	98.8	70.7	98.7
	2070	98.8	70.7	98.7
	2080	98.8	70.7	98.7
	2080	98.8	70.7	98.7
	2080	98.8	70.7	98.7
	2080	98.8	70.7	98.7
	2080	98.8	70.7	98.7
	2080	98.8	70.7	98.7
	2080	98.8	70.7	98.7
	2080	98.8	70.7	98.7
	2080	98.8	70.7	98.7
	2080	98.8	70.7	98.7
	2080	98.8	70.7	98.7
	2090	98.8	70.7	98.7
	2090	98.8	70.7	98.7
	2090	98.8	70.7	98.7
	2090	98.8	70.7	98.7
	2090	98.8	70.7	98.7
	2090	98.8	70.7	98.7
	2090	98.8	70.7	98.7
	2090	98.8	70.7	98.7
	2090	98.8	70.7	98.7
	2090	98.8	70.7	98.7
	2100	98.8	70.7	98.7
	2100	98.8	70.7	98.7
	2100	98.8	70.7	98.7
	2100	98.8	70.7	98.7
	2100	98.8	70.7	98.7
	2100	98.8	70.7	98.7
	2100	98.8	70.7	98.7
	2100	98.8	70.7	98.7
	2100	98.8	70.7	98.7
	2100	98.8	70.7	98.7
	2100	98.8	70.7	98.7
	2110	98.8	70.7	98.7
	2110	98.8	70.7	98.7
	2110	98.8	70.7	98.7
	2110	98.8	70.7	98.7
	2110	98.8	70.7	98.7
	2110	98.8	70.7	98.7
	2110	98.8	70.7	98.7
	2110	98.8	70.7	98.7
	2110	98.8	70.7	98.7
	2110	98.8	70.7	98.7
	2120	98.8	70.7	98.7
	2120	98.8	70.7	98.7
	2120	98.8	70.7	98.7
	2120	98.8	70.7	98.7
	2120	98.8	70.7	98.7
	2120	98.8	70.7	98.7
	2120	98.8	70.7	98.7
	2120	98.8	70.7	98.7
	2120	98.8	70.7	98.7
	2120	98.8	70.7	98.7
	2130	98.8	70.7	98.7
	2130	98.8	70.7	98.7
	2130	98.8	70.7	98.7
	2130	98.8	70.7	98.7
	2130	98.8	70.7	98.7
	2130	98.8	70.7	98.7
	2130	98.8	70.7	98.7
	2130	98.8	70.7	98.7
	2130	98.8	70.7	98.7
	2130	98.8	70.7	98.7
	2130	98.8	70.7	98.7
	2140	98.8	70.7	98.7
	2140	98.8	70.7	98.7
	2140	98.8	70.7	98.7
	2140	98.8	70.7	98.7
	2140	98.9	70.7	98.7
	2140	98.9	70.7	98.7
	2140	98.9	70.7	98.7
	2140	98.9	70.7	98.7
	2140	98.9	70.7	98.7
	2140	98.9	70.7	98.7
	2150	98.9	70.7	98.7
	2150	98.9	70.7	98.7
	2150	98.9	70.7	98.7
	2150	98.9	70.7	98.7
	2150	98.9	70.7	98.7
	2150	98.9	70.7	98.7
	2150	98.9	70.7	98.7
	2150	98.9	70.7	98.7
	2150	98.9	70.7	98.7
	2150	98.9	70.7	98.7
	2160	98.9	70.7	98.7
	2160	98.9	70.7	98.7
	2160	98.9	70.6	98.6
	2160	98.9	70.6	98.6
	2160	98.9	70.6	98.6
	2160	98.9	70.6	98.6
	2160	98.9	70.6	98.6
	2160	98.9	70.6	98.6
	2160	98.9	70.6	98.6
	2160	98.9	70.6	98.6
	2160	98.9	70.6	98.6
	2170	98.9	70.6	98.6
	2170	98.9	70.6	98.6
	2170	98.9	70.6	98.6
	2170	98.9	70.6	98.6
	2170	98.9	70.6	98.6
	2170	98.9	70.6	98.6
	2170	98.9	70.6	98.6
	2170	98.9	70.6	98.6
	2170	98.9	70.6	98.6
	2170	98.9	70.6	98.6
	2180	98.9	70.6	98.6
	2180	98.9	70.6	98.6
	2180	98.9	70.6	98.6
	2180	98.9	70.6	98.6
	2180	98.9	70.6	98.6
	2180	98.9	70.6	98.6
	2180	98.9	70.6	98.6
	2180	98.9	70.6	98.6
	2180	98.9	70.6	98.6
	2180	98.9	70.6	98.6
	2180	98.9	70.6	98.6
	2190	98.9	70.6	98.6
	2190	98.9	70.6	98.6
	2190	98.9	70.6	98.6
	2190	98.9	70.6	98.6
	2190	98.9	70.6	98.6
	2190	98.9	70.6	98.6
	2190	98.9	70.6	98.6
	2190	98.9	70.6	98.6
	2190	98.9	70.6	98.6
	2190	98.9	70.6	98.6
	2200	98.9	70.6	98.6
	2200	98.9	70.6	98.6
	2200	98.9	70.6	98.6
	2200	98.9	70.6	98.6
	2200	98.9	70.6	98.6
	2200	98.9	70.6	98.6
	2200	98.9	70.6	98.6
	2200	98.9	70.6	98.6
	2200	98.9	70.6	98.6
	2200	98.9	70.6	98.6
	2210	98.9	70.6	98.6
	2210	98.9	70.6	98.6
	2210	98.9	70.6	98.6
	2210	98.9	70.6	98.6
	2210	98.9	70.6	98.6
	2210	98.9	70.6	98.6
	2210	98.9	70.6	98.6
	2210	98.9	70.6	98.6
	2210	98.9	70.6	98.6
	2210	98.9	70.6	98.6
	2210	98.9	70.6	98.6
	2220	98.9	70.6	98.6
	2220	98.9	70.6	98.6
	2220	98.9	70.6	98.6
	2220	98.9	70.6	98.6
	2220	98.9	70.6	98.6
	2220	98.9	70.6	98.6
	2220	98.9	70.6	98.6
	2220	98.9	70.6	98.6
	2220	98.9	70.6	98.6
	2220	98.9	70.6	98.6
	2230	98.9	70.6	98.6
	2230	98.9	70.6	98.6
	2230	98.9	70.6	98.6
	2230	98.9	70.6	98.6
	2230	98.9	70.6	98.6
	2230	98.9	70.6	98.6
	2230	98.9	70.6	98.6
	2230	98.9	70.6	98.6
	2230	98.9	70.6	98.6
	2230	98.9	70.6	98.6
	2240	98.9	70.6	98.6
	2240	98.9	70.6	98.6
	2240	98.9	70.6	98.6
	2240	98.9	70.6	98.6
	2240	98.9	70.6	98.6
	2240	98.9	70.6	98.6
	2240	98.9	70.6	98.6
	2240	98.9	70.6	98.6
	2240	98.9	70.6	98.6
	2240	98.9	70.6	98.6
	2240	98.9	70.6	98.6
	2250	98.9	70.6	98.6
	2250	98.9	70.6	98.6
	2250	98.9	70.6	98.6
	2250	98.9	70.6	98.6
	2250	98.9	70.6	98.6
	2250	98.9	70.6	98.6
	2250	98.9	70.6	98.6
	2250	98.9	70.6	98.6
	2250	98.9	70.6	98.6
	2250	98.9	70.6	98.6
	2260	98.9	70.6	98.6
	2260	98.9	70.6	98.6
	2260	98.9	70.6	98.6
	2260	98.9	70.6	98.6
	2260	98.9	70.6	98.6
	2260	98.9	70.6	98.6
	2260	98.9	70.5	98.5
	2260	98.9	70.5	98.5
	2260	98.9	70.5	98.5
	2260	98.9	70.5	98.5
	2270	98.9	70.5	98.5
	2270	98.9	70.5	98.5
	2270	98.9	70.5	98.5
	2270	98.9	70.5	98.5
	2270	98.9	70.5	98.5
	2270	98.9	70.5	98.5
	2270	98.9	70.5	98.5
	2270	98.9	70.5	98.5
	2270	98.9	70.5	98.5
	2270	98.9	70.5	98.5
	2270	98.9	70.5	98.5
	2280	98.9	70.5	98.5
	2280	98.9	70.5	98.5
	2280	98.9	70.5	98.5
	2280	98.9	70.5	98.5
	2280	98.9	70.5	98.5
	2280	98.9	70.5	98.5
	2280	98.9	70.5	98.5
	2280	98.9	70.5	98.5
	2280	98.9	70.5	98.5
	2280	98.9	70.5	98.5
	2290	98.9	70.5	98.5
	2290	98.9	70.5	98.5
	2290	98.9	70.5	98.5
	2290	98.9	70.5	98.5
	2290	98.9	70.5	98.5
	2290	98.9	70.5	98.5
	2290	98.9	70.5	98.5
	2290	98.9	70.5	98.5
	2290	98.9	70.5	98.5
	2290	98.9	70.5	98.5
	2290	98.9	70.5	98.5
	2300	98.9	70.5	98.5
	2300	98.9	70.5	98.5
	2300	98.9	70.5	98.5
	2300	98.9	70.5	98.5
	2300	98.9	70.5	98.5
	2300	98.9	70.5	98.5
	2300	98.9	70.5	98.5
	2300	98.9	70.5	98.5
	2300	98.9	70.5	98.5
	2300	98.9	70.5	98.5
	2310	98.9	70.5	98.5
	2310	98.9	70.5	98.5
	2310	98.9	70.5	98.5
	2310	98.9	70.5	98.5
	2310	98.9	70.5	98.5
	2310	98.9	70.5	98.5
	2310	98.9	70.5	98.5
	2310	98.9	70.5	98.5
	2310	98.9	70.5	98.5
	2310	98.9	70.5	98.5
	2320	98.9	70.5	98.5
	2320	98.9	70.5	98.5
	2320	98.9	70.5	98.5
	2320	98.9	70.5	98.5
	2320	98.9	70.5	98.5
	2320	98.9	70.4	98.4
	2320	98.9	70.4	98.4
	2320	98.9	70.4	98.4
	2320	98.9	70.4	98.4
	2320	98.9	70.4	98.4
	2320	98.9	70.4	98.4
	2330	98.9	70.4	98.4
	2330	98.9	70.4	98.4
	2330	98.9	70.4	98.4
	2330	98.9	70.4	98.4
	2330	98.9	70.4	98.4
	2330	98.9	70.4	98.4
	2330	98.9	70.4	98.4
	2330	98.9	70.4	98.4
	2330	98.9	70.4	98.4
	2330	98.9	70.4	98.4
	2340	98.9	70.4	98.4
	2340	98.9	70.4	98.4
	2340	98.9	70.4	98.4
	2340	98.9	70.4	98.4
	2340	98.9	70.4	98.4
	2340	98.9	70.4	98.4
	2340	98.9	70.4	98.4
	2340	98.9	70.4	98.4
	2340	98.9	70.4	98.4
	2340	98.9	70.4	98.4
	2350	98.9	70.4	98.4
	2350	98.9	70.4	98.4
	2350	98.9	70.4	98.4
	2350	98.9	70.4	98.4
	2350	98.9	70.4	98.4
	2350	98.9	70.4	98.4
	2350	98.9	70.4	98.4
	2350	98.9	70.4	98.4
	2350	98.8	70.4	98.4
	2350	98.8	70.4	98.4
	2350	98.8	70.4	98.4
	2360	98.8	70.4	98.4
	2360	98.8	70.4	98.4
	2360	98.8	70.4	98.4
	2360	98.8	70.4	98.4
	2360	98.8	70.4	98.4
	2360	98.8	70.4	98.4
	2360	98.8	70.4	98.4
	2360	98.8	70.4	98.4
	2360	98.8	70.4	98.4
	2360	98.8	70.4	98.4
	2370	98.8	70.4	98.4
	2370	98.8	70.4	98.4
	2370	98.8	70.3	98.3
	2370	98.8	70.3	98.3
	2370	98.8	70.3	98.3
	2370	98.8	70.3	98.3
	2370	98.8	70.3	98.3
	2370	98.8	70.3	98.3
	2370	98.8	70.3	98.3
	2370	98.8	70.3	98.3
	2370	98.8	70.3	98.3
	2380	98.8	70.3	98.3
	2380	98.8	70.3	98.3
	2380	98.8	70.3	98.3
	2380	98.8	70.3	98.3
	2380	98.8	70.3	98.3
	2380	98.8	70.3	98.3
	2380	98.8	70.3	98.3
	2380	98.8	70.3	98.3
	2380	98.8	70.3	98.3
	2380	98.8	70.3	98.3
	2390	98.8	70.3	98.3
	2390	98.8	70.3	98.3
	2390	98.8	70.3	98.3
	2390	98.8	70.3	98.3
	2390	98.8	70.3	98.3
	2390	98.7	70.3	98.3
	2390	98.7	70.3	98.3
	2390	98.7	70.3	98.3
	2390	98.6	70.3	98.3
	2390	98.6	70.3	98.3
	2400	98.6	70.3	98.3
	2400	98.6	70.3	98.3
	2400	98.6	70.3	98.3
	2400	98.6	70.3	98.3
	2400	98.6	70.3	98.3
	2400	98.5	70.3	98.3
	2400	98.5	70.3	98.3
	2400	98.5	70.3	98.3
	2400	98.4	70.3	98.3
	2400	98.4	70.2	98.2
	2400	98.4	70.2	98.2
	2410	98.4	70.2	98.2
	2410	98.3	70.2	98.2
	2410	98.3	70.1	98.1
	2410	98.3	70.1	98.1
	2410	98.3	70.1	98.1
	2410	98.3	70.1	98.1
	2410	98.3	70.1	98.1
	2410	98.3	70.1	98.1
	2410	98.2	70	98
	2410	98.2	70	98
	2420	98.2	70	98
	2420	98.2	70	98
	2420	98.2	70	98
	2420	98.1	70	98
	2420	98.1	69.9	97.9
	2420	98.1	69.9	97.9
	2420	98.1	69.9	97.9
	2420	98.1	69.9	97.9
	2420	98.1	69.9	97.9
	2420	98	69.8	97.8
	2430	98	69.8	97.8
	2430	98	69.8	97.8
	2430	98	69.8	97.8
	2430	98	69.8	97.8
	2430	98	69.8	97.8
	2430	98	69.8	97.8
	2430	98	69.7	97.7
	2430	97.9	69.7	97.7
	2430	97.9	69.7	97.7
	2430	97.9	69.7	97.7
	2430	97.9	69.7	97.7
	2440	97.9	69.7	97.7
	2440	97.9	69.7	97.7
	2440	97.9	69.7	97.7
	2440	97.8	69.6	97.6
	2440	97.8	69.6	97.6
	2440	97.8	69.6	97.6
	2440	97.8	69.6	97.6
	2440	97.8	69.6	97.6
	2440	97.8	69.6	97.6
	2440	97.8	69.6	97.6
	2450	97.8	69.6	97.6
	2450	97.8	69.6	97.6
	2450	97.8	69.6	97.6
	2450	97.8	69.6	97.6
	2450	97.8	69.6	97.6
	2450	97.8	69.6	97.6
	2450	97.8	69.6	97.6
	2450	97.8	69.5	97.5
	2450	97.8	69.5	97.5
	2450	97.8	69.5	97.5
	2450	97.8	69.6	97.6
	2460	97.8	69.6	97.6
	2460	97.8	69.6	97.6
	2460	97.8	69.6	97.6
	2460	97.8	69.6	97.6
	2460	97.8	69.5	97.5
	2460	97.8	69.5	97.5
	2460	97.8	69.5	97.5
	2460	97.8	69.5	97.5
	2460	97.8	69.5	97.5
	2460	97.8	69.6	97.6
	2470	97.9	69.6	97.6
	2470	97.9	69.6	97.6
	2470	97.8	69.6	97.6
	2470	97.8	69.5	97.5
	2470	97.8	69.5	97.5
	2470	97.8	69.5	97.5
	2470	97.8	69.5	97.5
	2470	97.7	69.5	97.5
	2470	97.7	69.5	97.5
	2470	97.7	69.4	97.4
	2480	97.7	69.4	97.4
	2480	97.7	69.4	97.4
	2480	97.7	69.3	97.3
	2480	97.7	69.3	97.3
	2480	97.7	69.3	97.3
	2480	97.7	69.3	97.3
	2480	97.7	69.3	97.3
	2480	97.7	69.3	97.3
	2480	97.7	69.3	97.3
	2480	97.6	69.3	97.3
	2480	97.6	69.3	97.3
	2490	97.6	69.2	97.2
	2490	97.6	69.2	97.2
	2490	97.6	69.2	97.2
	2490	97.6	69.2	97.2
	2490	97.6	69.2	97.2
	2490	97.6	69.2	97.2
	2490	97.5	69.2	97.2
	2490	97.5	69.1	97.1
	2490	97.5	69.1	97.1
	2490	97.5	69.1	97.1
	2500	97.5	69.1	97.1
	2500	97.5	69.1	97.1
	2500	97.5	69.1	97.1
	2500	97.5	69.1	97.1
	2500	97.5	69.1	97.1
	2500	97.5	69	97
	2500	97.5	69	97
	2500	97.5	69	97
	2500	97.5	69	97
	2500	97.4	69	97
	2510	97.4	69	97
	2510	97.4	69	97
	2510	97.4	69	97
	2510	97.4	69	97
	2510	97.4	69	97
	2510	97.4	69	97
	2510	97.4	69	97
	2510	97.4	69	97
	2510	97.3	69	97
	2510	97.3	68.9	96.9
	2510	97.4	68.9	96.9
	2520	97.4	68.9	96.9
	2520	97.4	68.9	96.9
	2520	97.4	68.8	96.8
	2520	97.3	68.8	96.8
	2520	97.3	68.8	96.8
	2520	97.3	68.8	96.8
	2520	97.3	68.8	96.8
	2520	97.3	68.8	96.8
	2520	97.3	68.8	96.8
	2520	97.3	68.8	96.8
	2530	97.3	68.8	96.8
	2530	97.2	68.8	96.8
[truncated: 1,045 more rows]

## Sheet: Viscosity
	Rotational speed (rpm)	Shear rate (s^-1)	Viscosity (cP)				Rotational speed (rpm)	30	50	60	100
	30	15.708	1280	1350	1320		Shear rate (s^-1)	15.708	26.1799	31.4159	52.3599		Shear rate (s^-1)	15.708	26.1799	31.4159	52.3599
	50	26.1799	1120	1180	1160		Viscosity (Pas)	1.28	1.12	1.092	0.935		Shear stress (Pa)	20.1062	29.3215	34.3062	48.9565
	60	31.4159	1092	1075	1067			1.35	1.18	1.075	0.985			21.2058	30.8923	33.7721	51.5745
	100	52.3599	935	985	1020			1.32	1.16	1.067	1.02			20.7345	30.3687	33.5208	53.4071
			Viscosity (Pas)					1.28	1.35	1.32				20.1062	21.2058	20.7345
			1.28	1.35	1.32			1.12	1.18	1.16				29.3215	30.8923	30.3687
			1.12	1.18	1.16			1.092	1.075	1.067				34.3062	33.7721	33.5208
			1.092	1.075	1.067			0.935	0.985	1.02				48.9565	51.5745	53.4071
			0.935	0.985	1.02

## Sheet: Shear lap
	Displacement (mm)	Force (N)		Displacement (mm)	Force (N)		Displacement (mm)	Force (N)	Shear strength (N/m2 or Pa)	Toughness (N)			Force	5 N
	0	-0.0367565		0	-0.00124598		20.4967	1.00115	1668.58	1.66858			Speed	10 mm/min
	0	-0.0492163		0	-0.000934487		18.37	1.105	1841.67	1.84167			Skin dimension	12 cm x 3 cm x 6mm
	0	-0.0489048		0	-0.00622991		14.64	0.729	1215	1.215			Hydrogel dimension	2 cm x 3 cm	0.0006 m2
	0	-0.0738244		0	-0.118991		17.8 ± 2.4	0.9 ± 0.2	1575.1 ± 264.2	1.6 ± 0.3			Hydrogel volume	0.2 mL
	0	-0.0869073		0.133095	0.13114
	0.133095	0.164158		0.26619	0.0922027
	0.26619	0.149518		0.399286	-0.0221162
	0.532381	0.249819		0.665476	0.213374
	0.665476	0.0856613		0.798571	0.067906
	0.798571	0.0968751		0.931667	0.0978096
	1.06476	0.261656		1.19786	0.124598
	1.06476	-0.0118368		1.19786	-0.109023
	1.33095	0.159797		1.46405	0.0666601
	1.46405	0.123975		1.73024	0.157617
	1.59714	-0.0482818		1.73024	-0.128025
	1.86333	0.177241		1.86333	0.0510853
	1.99643	-0.00218047		1.99643	0.156371
	2.12952	0.0109023		1.99643	0.115565
	2.39571	0.147337		1.99643	0.163224
	2.52881	-0.033953		1.99643	0.100302
	2.6619	0.14173		1.99643	0.134878
	2.795	0.167273		1.99643	0.164781
	2.9281	-0.0161978		1.99643	0.13737
	3.19429	0.224277		1.99643	0.150141
	3.32738	0.165404		1.99643	0.193127
	3.46048	-0.0211817		1.99643	0.156059
	3.72667	0.136747		1.99643	0.0934487
	3.85976	0.0993671		1.99643	0.145157
	3.99286	-0.0105908		1.99643	0.118057
	4.25905	0.223031		0	-0.0641681
	4.39214	0.138927		0	-0.0118368
	4.52524	0.191258		0	-0.0429864
	4.79143	0.325201		0	0.0442324
	4.79143	0.103417		0.133095	-0.149829
	5.05762	0.161355		0.266191	-0.0457898
	5.32381	0.153256		0.399286	0.00280346
	5.4569	0.0133943		0.665476	-0.138927
	5.59	0.202161		0.798571	-0.0517083
	5.7231	0.20621		1.06476	0.0317725
	5.85619	0.0211817		1.06476	-0.163847
	6.12238	0.16042		1.33095	-0.0532657
	6.25548	0.11463		1.46405	-0.0457898
	6.38857	-0.0523313		1.59714	-0.315234
	6.65476	0.218047		1.86333	-0.0295921
	6.78786	0.128648		2.12952	-0.0925142
	6.92095	0.146714		2.12952	-0.223654
	7.18714	0.215243		2.39571	-0.000934487
	7.32024	0.071021		2.52881	-0.0261656
	7.45333	0.0996786		2.6619	-0.0943832
	7.71952	0.206522		2.9281	0.037068
	7.85262	0.0619876		3.06119	-0.071021
	7.98571	0.140485		3.19429	-0.175372
	8.2519	0.257918		3.46048	0.0124598
	8.385	0.10622		3.59357	-0.0669715
	8.5181	0.102171		3.72667	-0.129894
	8.78429	0.260099		3.99286	0.138927
	8.91738	0.14173		4.12595	-0.138616
	9.05048	0.203407		4.25905	-0.0853498
	9.31667	0.313365		4.39214	-0.0432979
	9.31667	0.0875303		4.65833	-0.177552
	9.58286	0.276608		4.79143	-0.0423634
	9.71595	0.299347		4.92452	-0.00529542
	9.84905	0.164781		5.19071	-0.0585612
	10.1152	0.366942		5.32381	-0.00498393
	10.2483	0.257295		5.59	0.00622991
	10.3814	0.16042		5.7231	-0.0342645
	10.6476	0.37068		5.85619	-0.00186897
	10.7807	0.265394		5.98929	0.0274116
	10.9138	0.265394		6.12238	-0.11245
	11.18	0.412732		6.38857	-0.0227392
	11.3131	0.245459		6.52167	-0.0520198
	11.4462	0.328628		6.65476	-0.19998
	11.5793	0.31866		6.92095	-0.037691
	11.7124	0.199669		7.05405	-0.00436094
	11.9786	0.366319		7.18714	-0.108089
	12.1117	0.322709		7.45333	0.112761
	12.2448	0.249819		7.58643	0.035199
	12.511	0.454784		7.71952	-0.0239852
	12.644	0.375664		7.98571	0.132074
	12.7771	0.461325		8.11881	0.036445
	13.0433	0.546363		8.2519	-0.0775624
	13.0433	0.465063		8.5181	0.232687
	13.3095	0.400272		8.5181	0.0971866
	13.5757	0.583431		8.78429	0.131763
	13.7088	0.447308		9.05048	0.204964
	13.8419	0.562561		9.05048	0.0794314
	14.1081	0.59558		9.31667	0.240786
	14.1081	0.437028		9.44976	0.159174
	14.3743	0.642304		9.58286	0.0302151
	14.5074	0.625172		9.84905	0.24795
	14.6405	0.669715		9.98214	0.172569
	14.9067	0.793379		10.1152	0.163847
	15.0398	0.646353		10.3814	0.333923
	15.1729	0.733261		10.5145	0.282838
	15.439	0.806774		10.6476	0.23736
	15.439	0.707718		10.9138	0.422699
	15.7052	0.799298		11.0469	0.347629
	15.9714	0.876549		11.18	0.368811
	15.9714	0.670027		11.4462	0.460079
	16.2376	0.937913		11.4462	0.268198
	16.3707	0.870007		11.7124	0.430798
	16.5038	0.77064		11.8455	0.404321
	16.77	0.969374		11.9786	0.415847
	16.9031	0.870942		12.2448	0.611777
	17.0362	0.911436		12.3779	0.514279
	17.3024	1.0298		12.511	0.48531
	17.3024	0.803347		12.7771	0.623614
	17.5686	1.00239		12.7771	0.537018
	17.8348	1.02108		13.0433	0.569725
	17.8348	0.917354		13.3095	0.701488
	18.101	0.997409		13.3095	0.475965
	18.3671	1.10519		13.5757	0.656321
	18.3671	0.802101		13.8419	0.668469
	18.6333	0.964702		13.8419	0.459767
	18.7664	0.90801		14.1081	0.71644
	18.8995	0.77687		14.2412	0.599317
	19.1657	1.02794		14.3743	0.628598
	19.2988	0.888074		14.6405	0.729211
	19.4319	0.925142
	19.6981	1.02326
	19.8312	0.825152
	19.9643	1.02575
	20.0974	0.95193
	20.2305	0.830759
	20.4967	1.00115

## Sheet: Frequency sweep
	Frequency (Hz)	G' (Pa)	G" (Pa)	ω in rad/s	|η*| in Pas	δ in °	tan(δ) in -	τ in Pa	ɣ in -
	100	8643.19	5664.34	628.319	16.4469	33.2389	0.655352	999.997	0.0967686
	71.9686	2752.84	443.634	452.192	6.16632	9.15478	0.161155	279.231	0.100141
	51.7948	1042.65	154.793	325.436	3.23897	8.44453	0.148461	105.447	0.100037
	37.276	618.792	317.259	234.212	2.96903	27.1446	0.512708	69.5197	0.0999734
	26.827	444.062	269.934	168.559	3.08301	31.2943	0.607874	51.9637	0.099994
	19.307	351.319	247.019	121.309	3.54028	35.1118	0.70312	42.9554	0.10002
	13.895	289.536	221.144	87.3046	4.17309	37.3722	0.763788	36.4317	0.0999965
	10	241.74	197.327	62.8319	4.96646	39.224	0.816278	31.2086	0.100011
	7.19686	201.714	174.415	45.2192	5.89711	40.8489	0.864667	26.6674	0.100004
	5.17948	168.118	152.591	32.5436	6.97653	42.2281	0.90764	22.7102	0.100027
	3.72759	141.248	134.164	23.4212	8.31768	43.5266	0.949847	19.4829	0.10001
	2.6827	117.563	114.902	16.8559	9.75261	44.3442	0.977367	16.4108	0.0998293
	1.9307	98.0699	97.4333	12.1309	11.3959	44.8134	0.993509	13.8248	0.100004
	1.3895	82.4968	81.6174	8.73046	13.2923	44.693	0.98934	11.5298	0.099354
	1	69.3923	68.381	6.28319	15.5054	44.5794	0.985426	9.73247	0.099899
	0.719686	59.3626	56.4515	4.52192	18.1159	43.5601	0.950962	8.14281	0.099401
	0.517947	51.3059	46.8932	3.25436	21.3582	42.4271	0.913993	7.37643	0.106125
	0.372759	45.0047	38.7601	2.34212	25.3596	40.7365	0.861246	6.31665	0.10635
	0.26827	40.0416	32.1094	1.68559	30.4498	38.7261	0.8019	5.42893	0.105774
	0.19307	36.0704	26.8153	1.21309	37.0506	36.6276	0.743414	4.49096	0.0999192
	0.13895	32.9435	22.4931	0.873046	45.6907	34.3244	0.682778	4.00386	0.100372
	0.1	30.4785	19.5324	0.628319	57.6144	32.6541	0.640858	3.50255	0.0967549
	0.0719686	28.2007	16.3687	0.452192	72.1087	30.1325	0.580437	3.18547	0.0976928
	0.0517948	26.4149	14.1436	0.325436	92.0707	28.1664	0.53544	2.93183	0.0978478
	0.037276	25.0894	12.0951	0.234212	118.921	25.7379	0.482081	2.71463	0.097464
	0.026827	24.0816	10.4509	0.168559	155.742	23.4599	0.43398	2.5449	0.0969425
	0.019307	23.351	8.80549	0.121309	205.723	20.6611	0.377093	2.40494	0.0963669
	0.013895	22.9547	7.39216	0.0873046	276.224	17.8502	0.322032	2.30317	0.0955053
	0.01	22.7313	6.31407	0.0628318	375.477	15.5237	0.27777	2.22761	0.0944227

## Sheet: Strain sweep
	tan(δ) in -	ɣ̇ in 1/s	ɣ in -	G' in Pa	G" in Pa	|G*| in Pa	t in s	t_seg in s	τ in Pa	T in °C		tan(δ) in -	ɣ̇ in 1/s	ɣ in -	G' in Pa	G" in Pa	|G*| in Pa	t in s	t_seg in s	τ in Pa	T in °C
	0.925372	0.650975	0.103606	61.4278	56.8436	83.6933	18.0783	6.83839	8.67112	36.9992		0.925372	0.650975	0.103606	61.4278	56.8436	83.6933	18.0783	6.83839	8.67112	36.9992
	0.90071	0.650181	0.103479	61.1482	55.0768	82.2955	24.6802	13.4403	8.5159	37.0001		0.898895	0.675942	0.10758	60.7115	54.5733	81.6341	31.401	20.1611	8.78216	36.9999
	0.898895	0.675942	0.10758	60.7115	54.5733	81.6341	31.401	20.1611	8.78216	36.9999		0.896192	0.730291	0.116229	60.2855	54.0274	80.9525	44.5972	33.3573	9.40906	37.0002
	0.897645	0.702626	0.111826	60.4448	54.258	81.225	38.0145	26.7746	9.08311	37.0004		0.894187	0.789226	0.125609	60.0637	53.7082	80.5743	59.8138	48.5739	10.1209	36.9998
	0.896192	0.730291	0.116229	60.2855	54.0274	80.9525	44.5972	33.3573	9.40906	37.0002		0.892986	0.852179	0.135629	60.0202	53.5971	80.4678	73.0843	61.8444	10.9137	37
	0.894489	0.758732	0.120756	60.2156	53.8622	80.7902	53.1944	41.9545	9.75591	37.0006		0.893483	0.921004	0.146582	59.8735	53.496	80.2911	86.3187	75.0788	11.7693	37.0001
	0.894187	0.789226	0.125609	60.0637	53.7082	80.5743	59.8138	48.5739	10.1209	36.9998		0.900699	0.999831	0.159128	59.6182	53.698	80.236	100.483	89.2429	12.7678	36.9994
	0.893301	0.819975	0.130503	60.0642	53.6555	80.5396	66.4208	55.1808	10.5107	36.9996		0.89531	1.07486	0.171069	59.6401	53.3964	80.0507	114.715	103.475	13.6942	37.0001
	0.892986	0.852179	0.135629	60.0202	53.5971	80.4678	73.0843	61.8444	10.9137	37		0.896184	1.1611	0.184794	59.5262	53.3465	79.9326	127.992	116.752	14.7711	37.0006
	0.893231	0.886085	0.141025	59.9426	53.5426	80.3736	79.7011	68.4612	11.3347	36.999		0.898245	1.25445	0.199652	59.4867	53.4336	79.9613	141.163	129.923	15.9644	37.0003
	0.893483	0.921004	0.146582	59.8735	53.496	80.2911	86.3187	75.0788	11.7693	37.0001		0.900309	1.35534	0.21571	59.4069	53.4846	79.9361	154.44	143.2	17.243	36.9987
	0.893893	0.957258	0.152352	59.8042	53.4585	80.2144	92.9103	81.6703	12.2208	36.9996		0.902369	1.46409	0.233017	59.2621	53.4762	79.8229	167.653	156.413	18.6001	36.9991
	0.900699	0.999831	0.159128	59.6182	53.698	80.236	100.483	89.2429	12.7678	36.9994		0.905053	1.5823	0.251831	59.1526	53.5362	79.7819	180.919	169.679	20.0915	37.0012
	0.901305	1.03945	0.165433	59.5522	53.6747	80.1713	108.117	96.8773	13.263	36.9998		0.907905	1.70992	0.272143	59.028	53.5918	79.727	195.242	184.002	21.6971	36.9995
	0.89531	1.07486	0.171069	59.6401	53.3964	80.0507	114.715	103.475	13.6942	37.0001		0.910773	1.84616	0.293825	58.8703	53.6175	79.6276	209.444	198.204	23.3966	37.0017
	0.895894	1.11713	0.177796	59.6164	53.41	80.0422	121.382	110.142	14.2312	36.9994		0.914728	1.99473	0.317472	58.6933	53.6885	79.5447	222.712	211.472	25.2532	37.0004
	0.896184	1.1611	0.184794	59.5262	53.3465	79.9326	127.992	116.752	14.7711	37.0006		0.918396	2.15555	0.343067	58.5253	53.7494	79.462	237.022	225.783	27.2608	36.9989
	0.896986	1.20714	0.192122	59.5099	53.3796	79.9425	134.549	123.309	15.3587	36.9991		0.922712	2.32913	0.370692	58.3209	53.8134	79.3549	252.271	241.031	29.4163	37.0002
	0.898245	1.25445	0.199652	59.4867	53.4336	79.9613	141.163	129.923	15.9644	37.0003		0.926868	2.5158	0.400403	58.0779	53.8305	79.1882	265.509	254.269	31.7072	37.0003
	0.899326	1.30376	0.2075	59.452	53.4667	79.9576	147.746	136.506	16.5912	36.9987		0.932317	2.7188	0.432711	57.8125	53.8995	79.0408	278.753	267.513	34.2018	36.9993
	0.900309	1.35534	0.21571	59.4069	53.4846	79.9361	154.44	143.2	17.243	36.9987		0.937064	2.93701	0.46744	57.5176	53.8977	78.8241	293.961	282.721	36.8455	37.0026
	0.901155	1.40888	0.224229	59.3144	53.4515	79.8453	161.04	149.801	17.9037	37.0002		0.943038	3.17389	0.50514	57.2489	53.9878	78.69	307.313	296.073	39.7494	36.9995
	0.902369	1.46409	0.233017	59.2621	53.4762	79.8229	167.653	156.413	18.6001	36.9991		0.948713	3.42855	0.545671	56.9051	53.9866	78.4395	320.5	309.26	42.8021	36.9983
	0.903845	1.52216	0.242259	59.2173	53.5232	79.8212	174.278	163.039	19.3374	36.9995		0.954568	3.70626	0.589869	56.5032	53.9361	78.1135	334.779	323.539	46.0767	37.0017
	0.905053	1.5823	0.251831	59.1526	53.5362	79.7819	180.919	169.679	20.0915	37.0012		0.960616	4.00666	0.63768	56.1281	53.9176	77.8298	349.048	337.808	49.6305	36.9999
	0.906558	1.64461	0.261748	59.0886	53.5672	79.7553	187.637	176.397	20.8758	37		0.96636	4.32537	0.688404	55.7293	53.8545	77.4988	362.311	351.071	53.3505	37.0001
	0.907905	1.70992	0.272143	59.028	53.5918	79.727	195.242	184.002	21.6971	36.9995		0.972346	4.67561	0.744146	55.2875	53.7586	77.1149	375.551	364.311	57.3847	37.001
	0.909532	1.77696	0.282812	58.9606	53.6266	79.7005	202.838	191.598	22.5403	36.9996		0.978204	5.05109	0.803906	54.846	53.6506	76.7233	389.697	378.457	61.6783	36.9991
	0.910773	1.84616	0.293825	58.8703	53.6175	79.6276	209.444	198.204	23.3966	37.0017		0.984029	5.45956	0.868917	54.3716	53.5032	76.2814	403.998	392.758	66.2822	36.9996
	0.912462	1.91891	0.305403	58.7869	53.6408	79.5816	216.077	204.837	24.3045	36.9994		0.989485	5.89954	0.938942	53.9049	53.3381	75.8333	417.201	405.961	71.203	36.9993
	0.914728	1.99473	0.317472	58.6933	53.6885	79.5447	222.712	211.472	25.2532	37.0004		0.994853	6.37588	1.01475	53.3829	53.1082	75.3008	430.453	419.213	76.4117	37.0003
	0.916373	2.07407	0.330099	58.6496	53.7449	79.5506	230.398	219.158	26.2596	36.9999		1.00017	6.90475	1.09892	52.8627	52.8718	74.7656	445.733	434.493	82.1618	37.0002
	0.918396	2.15555	0.343067	58.5253	53.7494	79.462	237.022	225.783	27.2608	36.9989		1.00592	7.44613	1.18509	52.3013	52.6112	74.1847	458.88	447.64	87.9155	36.9998
	0.920607	2.24096	0.356661	58.4346	53.7953	79.4263	245.668	234.428	28.3282	37.0003		1.01148	8.05138	1.28142	51.7151	52.309	73.5574	472.133	460.893	94.2577	37.0007
	0.922712	2.32913	0.370692	58.3209	53.8134	79.3549	252.271	241.031	29.4163	37.0002		1.01687	8.70223	1.385	51.1281	51.9904	72.9183	486.337	475.097	100.992	36.9991
	0.924769	2.4212	0.385346	58.1958	53.8177	79.266	258.829	247.589	30.5448	37.0008		1.02934	9.39639	1.49548	50.5654	52.0491	72.567	501.542	490.302	108.523	36.9999
	0.926868	2.5158	0.400403	58.0779	53.8305	79.1882	265.509	254.269	31.7072	37.0003		1.02457	10.2031	1.62388	50.0062	51.235	71.5936	516.723	505.483	116.259	36.9995
	0.92971	2.616	0.416349	57.9184	53.8473	79.0827	272.143	260.903	32.926	37.0004		1.03271	10.9936	1.74969	49.2346	50.8453	70.7764	531.966	520.726	123.837	37.0001
	0.932317	2.7188	0.432711	57.8125	53.8995	79.0408	278.753	267.513	34.2018	36.9993		1.04049	11.885	1.89156	48.4507	50.4124	69.9205	546.169	534.929	132.259	37.0001
	0.934498	2.82701	0.449933	57.6991	53.9197	78.9716	287.378	276.138	35.532	36.9999		1.0481	12.8779	2.04959	47.6778	49.9709	69.0671	560.424	549.184	141.559	36.9999
	0.937064	2.93701	0.46744	57.5176	53.8977	78.8241	293.961	282.721	36.8455	37.0026		1.05995	13.8898	2.21063	46.6714	49.4696	68.0107	573.662	562.422	150.347	36.9996
	0.940142	3.05276	0.485863	57.3989	53.9631	78.7823	300.564	289.324	38.2774	36.9993		1.07357	14.9992	2.3872	45.6283	48.9853	66.944	586.849	575.609	159.809	37.0007
	0.943038	3.17389	0.50514	57.2489	53.9878	78.69	307.313	296.073	39.7494	36.9995		1.08864	16.223	2.58197	44.4178	48.355	65.6593	600.083	588.843	169.53	36.9997
	0.945758	3.2992	0.525084	57.0581	53.9632	78.5344	313.903	302.663	41.2372	37.0001		1.10809	17.579	2.79779	43.0922	47.7502	64.3196	613.299	602.059	179.953	37.0005
	0.948713	3.42855	0.545671	56.9051	53.9866	78.4395	320.5	309.26	42.8021	36.9983		1.13095	18.956	3.01694	41.6473	47.1011	62.873	626.584	615.344	189.684	36.9998
	0.951533	3.56716	0.567731	56.7347	53.985	78.3148	328.118	316.879	44.4617	37.0004		1.15863	20.5156	3.26517	40.0423	46.3941	61.2845	641.862	630.622	200.104	36.9998
	0.954568	3.70626	0.589869	56.5032	53.9361	78.1135	334.779	323.539	46.0767	37.0017		1.19292	22.1005	3.51741	37.7719	45.0587	58.7962	655.033	643.793	206.81	36.9997
	0.957671	3.85103	0.612911	56.334	53.9494	78.0004	341.375	330.135	47.8073	36.9996		1.22326	23.9394	3.81007	36.0383	44.0844	56.9403	669.234	657.994	216.946	37.0005
	0.960616	4.00666	0.63768	56.1281	53.9176	77.8298	349.048	337.808	49.6305	36.9999		1.2995	25.4768	4.05476	33.689	43.7787	55.2406	683.514	672.274	223.987	36.9997
	0.963506	4.16226	0.662444	55.9245	53.8835	77.6594	355.715	344.475	51.445	37.0005		1.31029	28.0483	4.46402	31.9442	41.8563	52.6534	696.753	685.513	235.046	36.9996
	0.96636	4.32537	0.688404	55.7293	53.8545	77.4988	362.311	351.071	53.3505	37.0001		1.35427	30.3948	4.83749	29.9095	40.5056	50.3516	710.035	698.795	243.575	37.001
	0.969617	4.49759	0.715813	55.5068	53.8204	77.3152	368.956	357.716	55.3432	36.9999		1.38667	32.8062	5.22127	28.2562	39.1819	48.3077	724.218	712.978	252.228	36.999
	0.972346	4.67561	0.744146	55.2875	53.7586	77.1149	375.551	364.311	57.3847	37.001		1.41674	35.3626	5.62814	25.6406	36.3259	44.4636	737.517	726.277	250.247	37.0017
	0.974848	4.86459	0.774224	55.0893	53.7037	76.9345	383.113	371.873	59.5645	37.0017		1.50989	37.8865	6.02982	22.679	34.2429	41.072	752.799	741.559	247.657	37.0003
	0.978204	5.05109	0.803906	54.846	53.6506	76.7233	389.697	378.457	61.6783	36.9991		1.50129	41.2312	6.56214	21.5804	32.3985	38.9279	765.996	754.756	255.45	37.0001
	0.980814	5.25804	0.836843	54.6223	53.5743	76.5102	397.337	386.097	64.027	37		1.50862	44.6035	7.09887	20.065	30.2704	36.3167	779.35	768.11	257.807	36.9991
	0.984029	5.45956	0.868917	54.3716	53.5032	76.2814	403.998	392.758	66.2822	36.9996		1.58862	48.6677	7.74571	17.7003	28.119	33.2262	795.55	784.31	257.36	36.9996
	0.986831	5.67506	0.903213	54.1486	53.4355	76.0751	410.596	399.356	68.7121	36.9997		1.71476	51.6861	8.22609	15.5326	26.6347	30.8329	808.798	797.558	253.634	36.9999
	0.989485	5.89954	0.938942	53.9049	53.3381	75.8333	417.201	405.961	71.203	36.9993		1.88004	57.8946	9.21422	12.982	24.4068	27.6446	823.123	811.883	254.724	36.9994
	0.992063	6.13247	0.976013	53.6459	53.2201	75.5663	423.788	412.548	73.7537	37.0015		1.95105	59.4638	9.46396	12.7213	24.8199	27.8901	837.444	826.204	263.951	37.0008
	0.994853	6.37588	1.01475	53.3829	53.1082	75.3008	430.453	419.213	76.4117	37.0003
	0.997645	6.64258	1.0572	53.1103	52.9852	75.0209	438.136	426.896	79.312	37.0005
	1.00017	6.90475	1.09892	52.8627	52.8718	74.7656	445.733	434.493	82.1618	37.0002
	1.00355	7.16494	1.14034	52.549	52.7354	74.4474	452.323	441.083	84.895	37.0013
	1.00592	7.44613	1.18509	52.3013	52.6112	74.1847	458.88	447.64	87.9155	36.9998
	1.0087	7.74211	1.23219	52.0262	52.4787	73.8968	465.516	454.276	91.0553	36.9996
	1.01148	8.05138	1.28142	51.7151	52.309	73.5574	472.133	460.893	94.2577	37.0007
	1.01353	8.39009	1.33532	51.447	52.1429	73.2508	479.733	468.493	97.8135	37.0006
	1.01687	8.70223	1.385	51.1281	51.9904	72.9183	486.337	475.097	100.992	36.9991
	1.01882	9.04592	1.4397	50.8585	51.8156	72.6047	492.911	481.671	104.529	36.9998
	1.02934	9.39639	1.49548	50.5654	52.0491	72.567	501.542	490.302	108.523	36.9999
	1.02385	9.77872	1.55633	50.2508	51.4495	71.918	508.09	496.85	111.928	36.9997
	1.02457	10.2031	1.62388	50.0062	51.235	71.5936	516.723	505.483	116.259	36.9995
	1.02763	10.6115	1.68888	49.6608	51.0328	71.2078	525.359	514.119	120.261	37.0004
	1.03271	10.9936	1.74969	49.2346	50.8453	70.7764	531.966	520.726	123.837	37.0001
	1.04594	11.3763	1.8106	48.8395	51.0831	70.6737	539.585	528.345	127.962	37.0008
	1.04049	11.885	1.89156	48.4507	50.4124	69.9205	546.169	534.929	132.259	37.0001
	1.04458	12.3535	1.96612	48.0645	50.2073	69.5052	552.765	541.525	136.656	36.9986
	1.0481	12.8779	2.04959	47.6778	49.9709	69.0671	560.424	549.184	141.559	36.9999
	1.05565	13.361	2.12647	47.0954	49.7161	68.4811	567.043	555.803	145.623	37.0013
	1.05995	13.8898	2.21063	46.6714	49.4696	68.0107	573.662	562.422	150.347	36.9996
	1.06603	14.4355	2.29748	46.1678	49.2164	67.4813	580.249	569.009	155.037	36.9997
	1.07357	14.9992	2.3872	45.6283	48.9853	66.944	586.849	575.609	159.809	37.0007
	1.08153	15.6113	2.48461	45.009	48.6783	66.2977	593.463	582.223	164.724	37.0001
	1.08864	16.223	2.58197	44.4178	48.355	65.6593	600.083	588.843	169.53	36.9997
	1.09839	16.8539	2.68238	43.7585	48.0637	64.9994	606.664	595.424	174.353	37.0002
	1.10809	17.579	2.79779	43.0922	47.7502	64.3196	613.299	602.059	179.953	37.0005
	1.12236	18.2173	2.89937	42.3148	47.4926	63.6089	619.932	608.692	184.426	36.9993
	1.13095	18.956	3.01694	41.6473	47.1011	62.873	626.584	615.344	189.684	36.9998
	1.14179	19.7344	3.14083	41.1296	46.9615	62.4262	634.184	622.944	196.07	37.0002
	1.15863	20.5156	3.26517	40.0423	46.3941	61.2845	641.862	630.622	200.104	36.9998
	1.17449	21.3137	3.39218	38.8454	45.6236	59.9206	648.448	637.208	203.261	36.9999
	1.19292	22.1005	3.51741	37.7719	45.0587	58.7962	655.033	643.793	206.81	36.9997
	1.20217	22.9763	3.65679	37.3596	44.9125	58.4198	662.663	651.423	213.629	36.9999
	1.22326	23.9394	3.81007	36.0383	44.0844	56.9403	669.234	657.994	216.946	37.0005
	1.24611	24.8476	3.95462	34.8493	43.4261	55.6803	675.878	664.638	220.195	36.9999
	1.2995	25.4768	4.05476	33.689	43.7787	55.2406	683.514	672.274	223.987	36.9997
	1.28866	26.9984	4.29693	32.7909	42.2563	53.4867	690.123	678.883	229.829	36.9985
	1.31029	28.0483	4.46402	31.9442	41.8563	52.6534	696.753	685.513	235.046	36.9996
	1.34402	29.2079	4.64859	30.7658	41.3499	51.5398	703.387	692.147	239.587	37.0004
	1.35427	30.3948	4.83749	29.9095	40.5056	50.3516	710.035	698.795	243.575	37.001
	1.36913	31.2998	4.98152	29.3575	40.1943	49.7739	716.646	705.406	247.95	36.9994
	1.38667	32.8062	5.22127	28.2562	39.1819	48.3077	724.218	712.978	252.228	36.999
	1.41101	34.148	5.43482	26.4879	37.3747	45.8092	730.854	719.614	248.965	37.0002
	1.41674	35.3626	5.62814	25.6406	36.3259	44.4636	737.517	726.277	250.247	37.0017
	1.44639	36.7951	5.85612	24.4149	35.3135	42.9317	745.146	733.906	251.414	36.9999
	1.50989	37.8865	6.02982	22.679	34.2429	41.072	752.799	741.559	247.657	37.0003
	1.47672	39.9984	6.36595	22.0782	32.6035	39.3755	759.4	748.16	250.663	36.9997
	1.50129	41.2312	6.56214	21.5804	32.3985	38.9279	765.996	754.756	255.45	37.0001
	1.50398	42.697	6.79543	20.6863	31.1118	37.3613	772.619	761.379	253.886	37.0002
	1.50862	44.6035	7.09887	20.065	30.2704	36.3167	779.35	768.11	257.807	36.9991
	1.52407	46.3728	7.38046	18.7632	28.5965	34.2025	785.924	774.684	252.431	37.0002
	1.58862	48.6677	7.74571	17.7003	28.119	33.2262	795.55	784.31	257.36	36.9996
	1.65994	50.0133	7.95986	16.3159	27.0833	31.6183	802.174	790.934	251.677	37.0025
	1.71476	51.6861	8.22609	15.5326	26.6347	30.8329	808.798	797.558	253.634	36.9999
	1.84801	52.6462	8.3789	14.7388	27.2374	30.9695	816.493	805.253	259.491	36.9996
	1.88004	57.8946	9.21422	12.982	24.4068	27.6446	823.123	811.883	254.724	36.9994
	1.88067	59.8457	9.52474	12.5165	23.5394	26.6602	829.709	818.469	253.931	37.0003
	1.95105	59.4638	9.46396	12.7213	24.8199	27.8901	837.444	826.204	263.951	37.0008
	2.12529	63.9316	10.175	10.7818	22.9144	25.3242	844.043	832.803	257.675	37.0002

## Sheet: Continuous flow
	ɣ in -	ɣ̇ in 1/s	η in Pas	η' in Pas	|η*| in Pas	t in s	t_seg in s	τ in Pa	T in °C
	-2490.13	0.0906902	49.1117	0	0	173.919	1.005	4.45396	36.9988
	-2490.04	0.0996339	66.5679	0	0	174.914	2	6.63242	36.9992
	-2489.93	0.108196	79.8221	0	0	175.914	3.00003	8.63646	36.9979
	-2489.82	0.116813	90.4579	0	0	176.914	4.00003	10.5667	36.9989
	-2489.7	0.125989	98.9909	0	0	177.914	5.00003	12.4718	37.0001
	-2489.57	0.135439	106.222	0	0	178.914	6.00002	14.3866	36.9999
	-2489.43	0.145647	112.212	0	0	179.915	7.00005	16.3433	36.9991
	-2489.27	0.156564	117.203	0	0	180.915	8.00005	18.3497	36.9989
	-2489.11	0.16824	121.256	0	0	181.915	9.00005	20.4	36.9997
	-2488.94	0.180642	124.614	0	0	182.915	10	22.5106	36.9994
	-2488.75	0.194018	127.259	0	0	183.915	11.0001	24.6905	36.9996
	-2488.55	0.208408	129.222	0	0	184.915	12.0001	26.931	37.0008
	-2488.33	0.223656	130.767	0	0	185.915	13.0001	29.2467	37.0012
	-2488.1	0.240299	131.643	0	0	186.915	14.0001	31.6338	37
	-2487.85	0.257598	132.453	0	0	187.915	15.0001	34.1196	36.9997
	-2487.58	0.276732	132.612	0	0	188.915	16.0002	36.6979	36.9996
	-2487.29	0.296743	132.686	0	0	189.915	17.0001	39.3738	36.9997
	-2486.98	0.318742	132.183	0	0	190.915	18.0004	42.1321	36.9994
	-2486.65	0.342334	131.306	0	0	191.915	19.0001	44.9504	36.9999
	-2486.29	0.367486	130.06	0	0	192.915	20.0001	47.7952	37
	-2485.91	0.394804	128.34	0	0	193.915	21.0001	50.6692	36.9983
	-2485.5	0.423811	126.424	0	0	194.915	22.0001	53.5797	36.9992
	-2485.06	0.455042	124.282	0	0	195.915	23.0001	56.5538	37.0012
	-2484.59	0.48773	122.279	0	0	196.915	24.0001	59.6394	37.0029
	-2484.08	0.523437	120.083	0	0	197.915	25.0001	62.8561	37.0012
	-2483.53	0.562017	117.537	0	0	198.915	26.0001	66.0575	37
	-2482.95	0.602384	115.244	0	0	199.915	27.0001	69.4211	36.9994
	-2482.32	0.644979	113.21	0	0	200.915	28.0001	73.0178	37.0001
	-2481.65	0.69048	111.565	0	0	201.915	29.0001	77.0337	37.0012
	-2480.93	0.7402	109.905	0	0	202.915	30.0001	81.3514	37.0005
	-2480.16	0.792485	108.497	0	0	203.915	31.0002	85.9825	36.9999
	-2479.34	0.849323	107.176	0	0	204.915	32.0002	91.0267	36.9997
	-2478.45	0.915011	104.858	0	0	205.915	33.0002	95.9459	37.0012
	-2477.5	0.984713	101.67	0	0	206.915	34.0002	100.115	37.0017
	-2476.48	1.05427	99.029	0	0	207.915	35.0002	104.404	37.0009
	-2475.38	1.13003	96.516	0	0	208.915	36.0002	109.066	37.0002
	-2474.2	1.21378	93.6992	0	0	209.915	37.0002	113.73	36.9996
	-2472.93	1.30245	90.7064	0	0	210.915	38.0002	118.141	36.9993
	-2471.58	1.39293	88.3715	0	0	211.915	39.0002	123.095	36.9999
	-2470.13	1.49422	86.1176	0	0	212.915	40.0002	128.678	36.9994
	-2468.57	1.61215	82.452	0	0	213.915	41.0002	132.925	36.9985
	-2466.9	1.72644	79.1542	0	0	214.915	42.0002	136.655	36.9996
	-2465.11	1.83999	77.1349	0	0	215.915	43.0002	141.927	37.0002
	-2463.19	1.97812	74.7518	0	0	216.915	44.0002	147.868	36.9996
	-2461.12	2.12949	71.7064	0	0	217.915	45.0002	152.698	36.9981
	-2458.91	2.28766	68.0097	0	0	218.915	46.0002	155.583	36.9995
	-2456.53	2.45939	64.4148	0	0	219.915	47.0002	158.421	37.0014
	-2453.97	2.63548	60.5287	0	0	220.915	48.0002	159.522	37.0015
	-2451.23	2.81008	57.804	0	0	221.915	49.0002	162.434	37.0006
	-2448.31	3.01739	55.4068	0	0	222.915	50.0003	167.184	37
	-2445.17	3.23043	52.9308	0	0	223.915	51.0002	170.989	37.0005
	-2441.81	3.4547	51.0555	0	0	224.915	52.0003	176.381	37.0003
	-2438.22	3.70061	49.3371	0	0	225.915	53.0003	182.577	37.0003
	-2434.37	3.9727	47.8146	0	0	226.915	54.0002	189.953	37.0001
	-2430.22	4.27027	45.2523	0	0	227.915	55.0003	193.24	36.9989
	-2425.78	4.5802	43.068	0	0	228.915	56.0003	197.26	36.9989
	-2421.01	4.91238	40.3653	0	0	229.915	57.0003	198.289	37
	-2415.93	5.22959	39.2556	0	0	230.915	58.0003	205.291	37.0002
	-2410.48	5.62523	37.8495	0	0	231.915	59.0003	212.913	36.9992
	-2404.61	6.04426	35.756	0	0	232.915	60.0003	216.119	36.9997
	-2398.31	6.50057	33.3066	0	0	233.915	61.0003	216.512	37.0001
	-2391.55	6.94408	30.9799	0	0	234.915	62.0003	215.127	36.9993
	-2384.34	7.4209	29.6354	0	0	235.915	63.0003	219.921	36.9993
	-2376.64	7.9294	28.9129	0	0	236.915	64.0003	229.262	36.9999
	-2368.36	8.5583	27.4048	0	0	237.915	65.0003	234.538	36.9996
	-2359.46	9.14156	25.5297	0	0	238.915	66.0003	233.381	36.9993
	-2349.96	9.80512	24.5471	0	0	239.915	67.0003	240.687	36.9992
	-2339.74	10.5244	22.922	0	0	240.915	68.0003	241.241	36.9991
	-2328.79	11.3062	21.2457	0	0	241.915	69.0003	240.209	36.9999
	-2317.04	12.0973	19.5077	0	0	242.915	70.0003	235.991	37
	-2304.47	12.9423	18.2945	0	0	243.915	71.0004	236.772	36.9997
	-2290.99	13.8953	16.8709	0	0	244.915	72.0004	234.425	37.0001
	-2276.58	14.8094	16.1647	0	0	245.915	73.0004	239.389	37.0001
	-2261.09	16.0118	14.6818	0	0	246.915	74.0003	235.081	36.9995
	-2244.46	17.1352	12.9798	0	0	247.915	75.0004	222.412	37.0002
	-2226.67	18.2758	11.8615	0	0	248.915	76.0005	216.779	37.0007
	-2207.67	19.5943	11.2672	0	0	249.915	77.0004	220.774	37.0001
	-2187.28	21.0032	10.5554	0	0	250.915	78.0004	221.697	36.9998
	-2165.44	22.488	9.88564	0	0	251.915	79.0004	222.308	37.0002
	-2142.06	24.1108	9.414	0	0	252.915	80.0004	226.979	37.0003
	-2116.92	25.9021	8.367	0	0	253.915	81.0004	216.723	37.0002
	-2090	27.7507	7.48425	0	0	254.915	82.0004	207.693	37.0002
	-2061.14	29.753	6.55746	0	0	255.915	83.0004	195.104	37.0005
	-2030.24	31.7711	5.87565	0	0	256.915	84.0005	186.676	36.9998
	-1997.14	34.1327	5.28639	0	0	257.915	85.0004	180.439	37.0005
	-1961.64	36.5892	4.51432	0	0	258.915	86.0005	165.175	37.001
	-1923.56	39.2164	3.63523	0	0	259.915	87.0004	142.56	37.0003
	-1882.78	41.994	2.94001	0	0	260.915	88.0004	123.463	36.9998
	-1839.14	44.9412	2.51729	0	0	261.915	89.0006	113.13	36.9996
	-1792.4	48.1555	2.20188	0	0	262.915	90.0004	106.033	37.0005
	-1742.31	51.5851	1.86657	0	0	263.915	91.0005	96.2871	37.0008
	-1688.67	55.2691	1.70314	0	0	264.915	92.0004	94.1308	36.9999
	-1631.18	59.212	1.4952	0	0	265.915	93.0005	88.5336	36.9998
	-1569.6	63.4444	1.35578	0	0	266.915	94.0005	86.0169	36.9998
	-1503.61	67.9673	1.23364	0	0	267.915	95.0005	83.8475	36.9988
	-1432.91	72.8437	1.11761	0	0	268.915	96.0005	81.4109	36.9986
	-1357.17	78.0297	1.04197	0	0	269.915	97.0004	81.3049	36.9999
	-1276	83.6051	0.964883	0	0	270.915	98.0005	80.6692	37.0001
	-1189.04	89.5901	0.920486	0	0	271.915	99.0005	82.4665	36.9997
	-1095.85	96.0031	0.8728	0	0	272.915	99.9983	83.7915	36.9994

[truncated: 9 more sheets: Cyclic strain time sweep, Haemolysis, DCFDA, Cell viability, Release, Antibacterial, Biodegradation, Proliferation, Wound healing]
