# Supplementary material for: Dual-functional injectable hydrogels as antimicrobial and angiogenic therapeutics for dental pulp regeneration
Source: Royal Society of Chemistry journal article supplement (doi:10.1039/d5tb00559k), 2025-01-01
Supplement: d5tb00559k2.pdf [file d5tb00559k2.pdf]

## SUPPLEMENTARY INFORMATION

### **Dual-functional injectable hydrogel as antimicrobial and angiogenic therapeutics for dental pulp regeneration**

Nhu-Quynh Thi Nguyen <sup>a,1</sup>, Cuong Hung Luu <sup>b,c,1</sup>, Ngoc-Dan Ho Nguyen <sup>d</sup>, Duy Quoc Vo <sup>a</sup>,  
Ngoc Hong T. Luu <sup>e</sup>, Nhu-Y Ngoc Ha <sup>a</sup>, Thanh-Truc Ngoc Vo <sup>d</sup>, Que-Phuong Le Huynh <sup>a</sup>,  
Thavasyappan Thambi <sup>f</sup>, Chau T.T. Ngo <sup>d,\*</sup>, Giang V.H. Phan <sup>a,\*</sup>

<sup>a</sup> *Biomaterials and Nanotechnology Research Group, Faculty of Applied Sciences, Ton Duc Thang University, Ho Chi Minh City, Vietnam*

<sup>b</sup> *School of Environment and Science, Griffith University, Nathan, QLD 4111, Australia*

<sup>c</sup> *Queensland Micro- and Nanotechnology Centre, Griffith University, Nathan, QLD 4111, Australia*

<sup>d</sup> *Group of Applied Research in Advanced Materials for Sustainable Development, Faculty of Applied Sciences, Ton Duc Thang University, Ho Chi Minh City, Vietnam*

<sup>e</sup> *School of Biomedical Engineering, International University, Ho Chi Minh City, Vietnam*

<sup>f</sup> *Graduate School of Biotechnology, College of Life Sciences, Kyung Hee University, Yongin si, Gyeonggi do 17104, Republic of Korea*

<sup>1</sup> These authors contributed equally.

\* Corresponding authors:

Chau T.T. Ngo, Ph.D., email: ngothituongchau@tdtu.edu.vn

V.H. Giang Phan, Ph.D., email: phanvuhoanggiang@tdtu.edu.vn

### Crosslinking density calculation

The Flory-Rehner equation was employed to calculate the crosslinking density, following the approach described by Leach et al., to determine the average molecular weight between crosslinks and the mesh size [1]. The Flory-Rehner equation is presented below.

$$\text{Crosslinking density (mol} \cdot \text{mL}^{-1}) = - \frac{\ln(1 - \varphi_p) + \varphi_p + \chi \varphi_p^2}{2\varphi_s \left( \varphi_p^{1/3} - \frac{\varphi_p}{2} \right)} \quad (\text{S1})$$

Here,  $\varphi_p$  represents the polymer volume fraction in the swollen state, while  $\varphi_s$  denotes the molar volume of the solvent ( $\text{mL} \cdot \text{mol}^{-1}$ ). For PBS, this value was approximated to that of water, which is  $18 \text{ mL} \cdot \text{mol}^{-1}$ . The polymer-solvent interaction parameter ( $\chi$ ) was estimated to be approximately 0.473, as described in [1]

To determine  $\varphi_p$ , the swelling ratio was utilised in calculations based on the equation presented below, which was adapted from the study by Richbourg et al. [2].

$$\varphi_p = \frac{1}{1 + \frac{\rho_p}{\rho_s} Q} \quad (\text{S2})$$

In this equation,  $\rho_p$  denotes the density of the nonswollen polymer network, which was estimated to be approximately  $1.7 \text{ g} \cdot \text{mL}^{-1}$ , while the polymer-solvent interaction parameter ( $\rho_s$ ) corresponded to the density of water ( $1 \text{ g} \cdot \text{mL}^{-1}$ ). The results obtained from these calculations depended upon the volumetric swelling ratio ( $Q$ ), determined experimentally for each hydrogel sample. All computed values derived from these calculations were subsequently compiled and are summarised in Table S1.

**Table S1.** Crosslinking density of HACM hydrogels calculated from swelling ratio results

| Samples | Crosslinking density ( $\text{nmol} \cdot \text{mL}^{-1}$ ) |
|---------|-------------------------------------------------------------|
| HACM1   | $23.4 \pm 5.9$                                              |
| HACM2   | $175 \pm 14.2$                                              |
| HACM3   | $94.9 \pm 1.9$                                              |

HACM4

$45.9 \pm 6.7$

**Table S2.** Drug release kinetic of drug-loaded HACM hydrogels

|                         | HACM/AX                           |                | HACM/EPO                          |                |
|-------------------------|-----------------------------------|----------------|-----------------------------------|----------------|
|                         | Regression equations              | R <sup>2</sup> | Regression equations              | R <sup>2</sup> |
| <b>Zero-order</b>       | $Q = 0.0046 t - 0.0645$           | 0.9847         | $Q = 0.0046 t - 0.0618$           | 0.9778         |
| <b>First-order</b>      | $\log Q = 0.0055 t - 1.0568$      | 0.9699         | $\log Q = 0.0055 t - 1.0386$      | 0.9673         |
| <b>Higuchi</b>          | $Q = 8.5708 t^{1/2} - 42.2542$    | 0.9338         | $Q = 8.6170 t^{1/2} - 42.1000$    | 0.9244         |
| <b>Hixson-Crowell</b>   | $Q^{1/3} = -0.0119 t + 5.0112$    | 0.9190         | $Q^{1/3} = -0.0124 t + 5.0406$    | 0.8870         |
| <b>Korsmeyer-Peppas</b> | $\log Q = 1.0079 \log t - 2.4478$ | 0.9867         | $\log Q = 0.9841 \log t - 2.3951$ | 0.9946         |

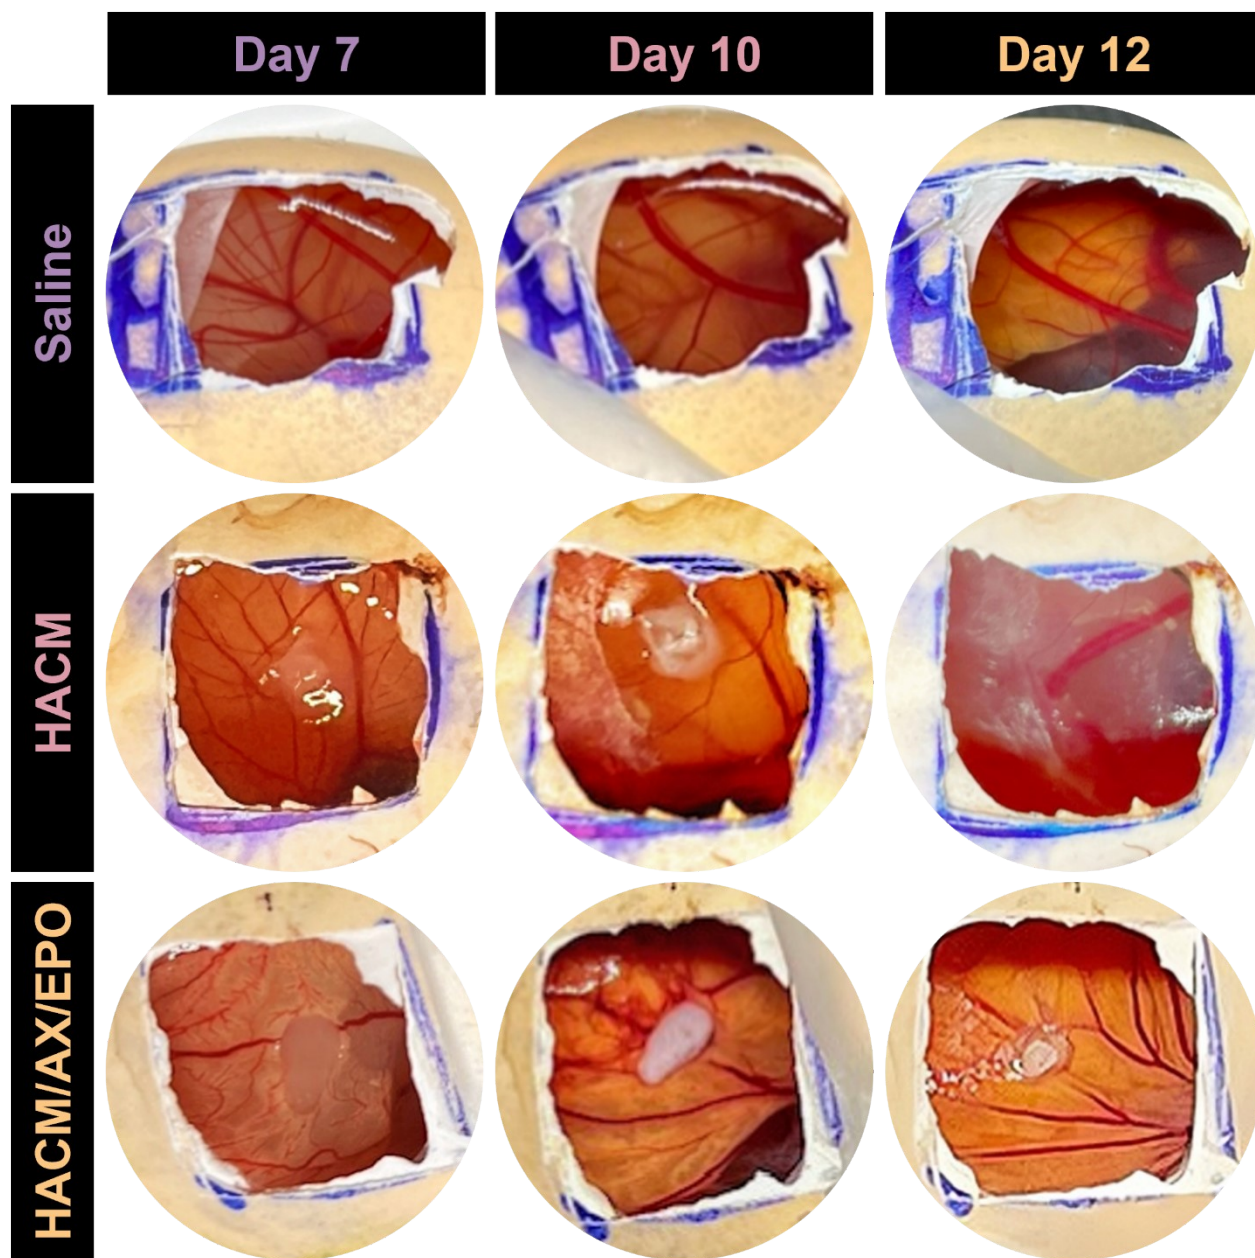

**Figure S1.** Chick embryo chorioallantoic membrane (CAM) assay performed with HACM and HACM/AX/EPO using saline as control and monitored on days 7, 10, and 12 of embryonic development.

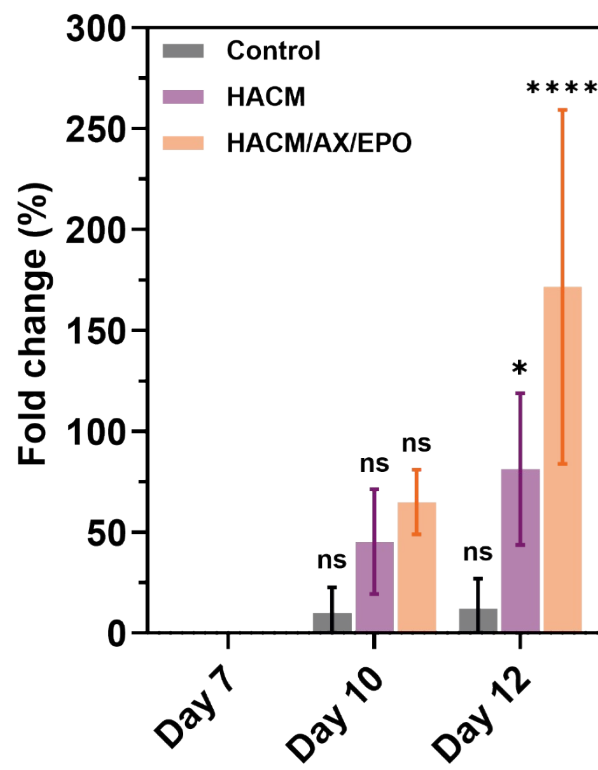

**Figure S2.** Vascular area expansion quantified via CAM assay results.

## References

1. Baier Leach, J., et al., *Photocrosslinked hyaluronic acid hydrogels: Natural, biodegradable tissue engineering scaffolds*. Biotechnology and Bioengineering, 2003. **82**(5): p. 578-589.
2. Richbourg, N.R., et al., Precise control of synthetic hydrogel network structure via linear, independent synthesis-swelling relationships. Science Advances, 2021. **7**(7): p. eabe3245.
